# Supplementary material
Source: PubMed Central journal article supplement (PMC8111418)
Supplement: mmc1.pdf [file mmc1.pdf]

# THE LANCET

## Supplementary appendix

This appendix formed part of the original submission and has been peer reviewed. We post it as supplied by the authors.

Supplement to: Mathur R, Rentsch CT, Morton CE, et al. Ethnic differences in SARS-CoV-2 infection and COVID-19-related hospitalisation, intensive care unit admission, and death in 17 million adults in England: an observational cohort study using the OpenSAFELY platform. *Lancet* 2021; published online April 30. [http://dx.doi.org/10.1016/S0140-6736\(21\)00634-6](http://dx.doi.org/10.1016/S0140-6736(21)00634-6).

|                                                                                                                                         |              |
|-----------------------------------------------------------------------------------------------------------------------------------------|--------------|
| <b>SUPPLEMENTARY APPENDIX .....</b>                                                                                                     | <b>.....</b> |
| OPEN SOURCE MATERIALS: .....                                                                                                            | 2            |
| INFORMATION GOVERNANCE AND ETHICS .....                                                                                                 | 2            |
| PATIENT AND PUBLIC INVOLVEMENT .....                                                                                                    | 2            |
| TABLE S1. BASELINE CHARACTERISTICS BY ETHNIC GROUP IN 16 CATEGORIES.....                                                                | 3            |
| TABLE S2. COMPARISON OF CHARACTERISTICS OF THE GENERAL POPULATION VS. THOSE RECEIVING A TEST FOR SARS-CoV-2 IN WAVES 1 AND 2 .....      | 4            |
| TABLE S3. ASSOCIATION BETWEEN ETHNICITY IN 5 CATEGORIES AND NON-COVID-19 RELATED MORTALITY WAVE 1 (SERIAL ADJUSTMENT) .....             | 5            |
| TABLE S4. ASSOCIATION BETWEEN ETHNICITY IN 16 CATEGORIES AND COVID-19 OUTCOMES IN WAVE 1 (SERIAL ADJUSTMENT).....                       | 5            |
| TABLE S5. ASSOCIATION BETWEEN ETHNICITY IN 5 CATEGORIES AND COVID-19 OUTCOMES IN WAVE 2 (SERIAL ADJUSTMENT).....                        | 9            |
| TABLE S6. ASSOCIATION BETWEEN ETHNICITY IN 16 CATEGORIES AND COVID-19 OUTCOMES IN WAVE 2 (SERIAL ADJUSTMENT).....                       | 11           |
| TABLE S7. TESTING THE PROPORTIONAL HAZARDS ASSUMPTIONS FOR EACH OUTCOME (WAVE 1) .....                                                  | 14           |
| FIGURE S1. ODDS OF TESTING POSITIVE FOR SARS-CoV-2 AMONGST THOSE EVER RECEIVING A TEST .....                                            | 15           |
| FIGURE S2. ASSOCIATION BETWEEN ETHNICITY IN 5 CATEGORIES AND COVID-19 OUTCOMES IN THE CARE-HOME POPULATION IN WAVE 1 AND WAVE 2 ....    | 16           |
| FIGURE S3. ETHNIC DIFFERENCES IN ALL STUDY OUTCOMES IN WAVE 1: COMPLETE CASE ANALYSIS (CC) VS. MULTIPLE IMPUTATION (MI) IN WAVE 1 ..... | 17           |
| FIGURE S4. COMPARISON BETWEEN COVID-19 AS ANY CAUSE OF DEATH VS. UNDERLYING CAUSE OF DEATH IN WAVE 1 .....                              | 18           |
| FIGURE S5. ETHNIC DIFFERENCES IN COVID-19 OUTCOMES WITH AND WITHOUT CLUSTERING BY STP REGION IN WAVE 1 .....                            | 19           |
| FIGURE S6. KAPLAN MEIER PLOTS FOR SURVIVAL BY ETHNIC GROUP AND OUTCOME IN WAVE 1.....                                                   | 20           |
| DATA ACCESS AND VERIFICATION .....                                                                                                      | 21           |

## **Open source materials:**

Open source materials: All code for data management and analyses and raw outputs are openly shared online for review and re-use (<https://github.com/opensafely/ethnicity-covid-research>). All iterations of the pre-specified study protocol are archived with version control (<https://github.com/opensafely/ethnicity-covid-research/tree/master/protocol>). Detailed information on all code lists is openly shared at <https://codelists.opensafely.org/> for inspection and reuse.

## **Information governance and ethics**

NHS England is the data controller; TPP is the data processor; and the key researchers on OpenSAFELY are acting on behalf of NHS England. OpenSAFELY is hosted within the TPP environment which is accredited to the ISO 27001 information security standard and is NHS IG Toolkit compliant;<sup>1,2</sup> patient data are pseudonymised for analysis and linkage using industry standard cryptographic hashing techniques; all pseudonymised datasets transmitted for linkage onto OpenSAFELY are encrypted; access to the platform is via a virtual private network (VPN) connection, restricted to a small group of researchers who hold contracts with NHS England and only access the platform to initiate database queries and statistical models. The platform includes pseudonymized data such as coded diagnoses, medications and physiological parameters. No free text data are included. This, in addition to other technical and organisational controls, minimizes any risk of re-identification. Similarly pseudonymized datasets from other data providers are securely provided to the EHR vendor and linked to the primary care data.

All database activity is logged; only aggregate statistical outputs leave the platform environment following best practice for anonymization of results such as statistical disclosure control for low cell counts.<sup>3</sup> The OpenSAFELY platform adheres to the data protection principles of the UK Data Protection Act 2018 and the EU General Data Protection Regulation (GDPR) 2016. In March 2020, the Secretary of State for Health and Social Care used powers under the UK Health Service (Control of Patient Information) Regulations 2002 (COPI) to require organisations to process confidential patient information for the purposes of protecting public health, providing healthcare services to the public and monitoring and managing the COVID-19 outbreak and incidents of exposure.<sup>4</sup> Taken together, these provide the legal bases to link patient datasets on the OpenSAFELY platform. This study was approved by the Health Research Authority (REC reference 20/LO/0651) and by the LSHTM Ethics Board (ref 21863).

## **Patient and public involvement**

Patients were not formally involved in developing this specific study design that was developed rapidly in the context of a global health emergency. We have developed a publicly available website <https://opensafely.org/> through which we invite any patient or member of the public to contact us regarding this study or the broader OpenSAFELY project.

Table S1. Baseline characteristics by ethnic group in 16 categories

|                                                                      | British        | Irish         | Other White    | White + Caribbean | White + African | White + Asian | Other mixed   | Indian         | Pakistani      | Bangladeshi   | Other Asian    | Caribbean     | African        | Other Black   | Chinese       | Other          |
|----------------------------------------------------------------------|----------------|---------------|----------------|-------------------|-----------------|---------------|---------------|----------------|----------------|---------------|----------------|---------------|----------------|---------------|---------------|----------------|
| Denominator                                                          | 9461409        | 78170         | 1338399        | 39208             | 33194           | 34264         | 63818         | 431814         | 301496         | 69959         | 222050         | 82561         | 190164         | 68187         | 103892        | 216896         |
| Age (years), Mean (SD)                                               | 52.3 (18.2)    | 53.7 (18.5)   | 42.9 (15.7)    | 40.8 (16.2)       | 40.9 (14.1)     | 39.3 (14.7)   | 39.4 (14.4)   | 44.9 (15.9)    | 41.4 (15.2)    | 39.9 (14.0)   | 42.3 (14.8)    | 50.8 (17.8)   | 41.2 (13.7)    | 42.4 (14.8)   | 37.7 (15.2)   | 41.4 (14.7)    |
| <b>Sex</b>                                                           |                |               |                |                   |                 |               |               |                |                |               |                |               |                |               |               |                |
| Female                                                               | 4929634 (52.1) | 39,401 (50.4) | 681,461 (50.9) | 21,204 (54.1)     | 16,468 (49.6)   | 17,554 (51.2) | 32,452 (50.9) | 203,092 (47.0) | 145,011 (48.1) | 32,808 (46.9) | 109,730 (49.4) | 43,219 (52.3) | 92,578 (48.7)  | 34,035 (49.9) | 54,265 (52.2) | 103,567 (47.7) |
| Male                                                                 | 4531775 (47.9) | 38,769 (49.6) | 656,938 (49.1) | 18,004 (45.9)     | 16,726 (50.4)   | 16,710 (48.8) | 31,366 (49.1) | 228,722 (53.0) | 156,485 (51.9) | 37,151 (53.1) | 112,320 (50.6) | 39,342 (47.7) | 97,586 (51.3)  | 34,152 (50.1) | 49,627 (47.8) | 113,329 (52.3) |
| <b>Index of Multiple Deprivation (IMD)</b>                           |                |               |                |                   |                 |               |               |                |                |               |                |               |                |               |               |                |
| 1 (most affluent)                                                    | 2110205 (22.3) | 14,498 (18.5) | 170,259 (12.7) | 4,098 (10.5)      | 3,538 (10.7)    | 5,946 (17.4)  | 8,677 (13.6)  | 49,069 (11.4)  | 12,084 (4.0)   | 3,185 (4.6)   | 23,460 (10.6)  | 5,105 (6.2)   | 12,549 (6.6)   | 5,062 (7.4)   | 19,824 (19.1) | 23,385 (10.8)  |
| 2                                                                    | 2036519 (21.5) | 16,707 (21.4) | 238,792 (17.8) | 5,232 (13.3)      | 4,664 (14.1)    | 6,501 (19.0)  | 10,858 (17.0) | 58,477 (13.5)  | 18,848 (6.3)   | 4,989 (7.1)   | 32,238 (14.5)  | 8,419 (10.2)  | 18,885 (9.9)   | 7,342 (10.8)  | 22,253 (21.4) | 32,385 (14.9)  |
| 3                                                                    | 1933434 (20.4) | 16,868 (21.6) | 270,218 (20.2) | 7,116 (18.1)      | 5,937 (17.9)    | 6,741 (19.7)  | 12,462 (19.5) | 95,147 (22.0)  | 36,448 (12.1)  | 47,622 (21.4) | 14,281 (17.3)  | 29,733 (15.6) | 10,717 (15.7)  | 21,610 (20.8) | 39,233 (18.1) | 31,239 (14.4)  |
| 4                                                                    | 1763848 (18.6) | 16,474 (21.1) | 333,060 (24.9) | 9,482 (24.2)      | 8,142 (24.5)    | 7,366 (21.5)  | 15,553 (24.4) | 141,970 (32.9) | 73,056 (24.2)  | 18,320 (26.2) | 61,927 (27.9)  | 21,751 (26.3) | 50,786 (26.7)  | 18,426 (27.0) | 24,182 (23.3) | 55,479 (25.6)  |
| 5 (most deprived)                                                    | 1617403 (17.1) | 13,623 (17.4) | 326,070 (24.4) | 13,280 (33.9)     | 10,913 (32.9)   | 7,710 (22.5)  | 16,268 (25.5) | 87,151 (20.2)  | 161,060 (53.4) | 33,197 (47.5) | 56,803 (25.6)  | 33,005 (40.0) | 78,211 (41.1)  | 26,640 (39.1) | 16,023 (15.4) | 66,414 (30.6)  |
| <b>Number of people in household</b>                                 |                |               |                |                   |                 |               |               |                |                |               |                |               |                |               |               |                |
| 1-2                                                                  | 4640170 (49.0) | 40,771 (52.2) | 488,759 (36.5) | 15,990 (40.8)     | 10,726 (32.3)   | 11,902 (34.5) | 23,799 (37.3) | 97,231 (22.5)  | 42,428 (14.1)  | 9,345 (13.4)  | 60,595 (27.3)  | 38,377 (46.5) | 56,075 (29.5)  | 23,712 (34.8) | 45,953 (44.5) | 72,641 (33.5)  |
| 3-5                                                                  | 3218856 (34.0) | 23,852 (30.5) | 519,471 (38.8) | 16,297 (41.6)     | 13,849 (41.7)   | 14,185 (41.4) | 25,233 (39.5) | 195,776 (45.3) | 113,234 (37.6) | 29,054 (41.5) | 92,868 (41.8)  | 30,397 (36.8) | 78,979 (41.5)  | 26,167 (38.4) | 32,700 (31.2) | 84,887 (39.1)  |
| 6-10                                                                 | 291,873 (3.1)  | 3,784 (4.8)   | 148,123 (11.1) | 2,813 (7.2)       | 4,623 (13.9)    | 3,560 (10.4)  | 7,187 (11.3)  | 73,063 (16.9)  | 89,761 (29.8)  | 20,303 (29.0) | 38,185 (17.2)  | 5,477 (6.6)   | 34,666 (18.2)  | 10,535 (15.5) | 8,602 (8.3)   | 81,239 (37.4)  |
| 11+                                                                  | 36,896 (0.4)   | 1,066 (1.4)   | 37,094 (2.8)   | 356 (0.9)         | 618 (1.9)       | 980 (2.9)     | 1,521 (2.4)   | 19,068 (4.4)   | 11,539 (3.8)   | 2,109 (3.0)   | 8,323 (3.7)    | 567 (0.7)     | 4,570 (2.4)    | 1,349 (2.0)   | 7,498 (7.2)   | 6,730 (3.1)    |
| unknown                                                              | 1273614 (13.5) | 8,697 (11.1)  | 144,952 (10.8) | 3,752 (9.6)       | 3,378 (10.2)    | 3,637 (10.6)  | 6,078 (9.5)   | 46,676 (10.8)  | 44,534 (14.8)  | 9,148 (13.1)  | 22,079 (9.9)   | 7,743 (9.4)   | 15,874 (8.3)   | 6,424 (9.4)   | 9,139 (8.8)   | 21,399 (9.9)   |
| <b>Number of GP consultations in the 12 months prior to baseline</b> |                |               |                |                   |                 |               |               |                |                |               |                |               |                |               |               |                |
| Mean (SD)                                                            | 6.7 (9.1)      | 6.4 (9.6)     | 4.0 (7.1)      | 6.2 (9.1)         | 5.0 (7.9)       | 5.0 (8.2)     | 4.7 (8.3)     | 5.8 (8.3)      | 6.9 (9.5)      | 6.5 (8.5)     | 5.1 (7.9)      | 6.5 (8.6)     | 4.9 (7.7)      | 5.5 (8.7)     | 2.2 (4.9)     | 4.6 (7.9)      |
| <b>Smoking status (missing set to non)</b>                           |                |               |                |                   |                 |               |               |                |                |               |                |               |                |               |               |                |
| Never                                                                | 4225276 (44.7) | 32,469 (41.5) | 625,154 (46.7) | 18,438 (47.0)     | 22,133 (66.7)   | 20,818 (60.8) | 34,974 (54.8) | 336,178 (77.9) | 210,718 (69.9) | 46,360 (66.3) | 157,778 (71.1) | 43,734 (53.0) | 145,279 (76.4) | 43,971 (64.5) | 82,208 (79.1) | 126,242 (58.2) |
| Former                                                               | 3626312 (38.3) | 31,244 (40.0) | 379,917 (28.4) | 10,452 (26.7)     | 6,370 (19.2)    | 7,699 (22.5)  | 15,277 (23.9) | 61,875 (14.3)  | 47,230 (15.7)  | 12,307 (17.6) | 37,691 (17.0)  | 22,272 (27.0) | 27,751 (14.6)  | 13,267 (19.5) | 12,435 (12.0) | 46,333 (21.4)  |
| Current                                                              | 1609821 (17.0) | 14,457 (18.5) | 333,328 (24.9) | 10,318 (26.3)     | 4,691 (14.1)    | 5,747 (16.8)  | 13,567 (21.3) | 33,761 (7.8)   | 43,548 (14.4)  | 11,292 (16.1) | 26,581 (12.0)  | 16,555 (20.1) | 17,134 (9.6)   | 10,949 (16.1) | 9,249 (8.9)   | 44,321 (20.4)  |
| <b>Body Mass Index (BMI, kg/m<sup>2</sup>)</b>                       |                |               |                |                   |                 |               |               |                |                |               |                |               |                |               |               |                |
| Mean (SD)                                                            | 27.6 (5.7)     | 26.9 (5.3)    | 26.2 (5.2)     | 27.6 (6.0)        | 27.7 (5.7)      | 25.7 (5.3)    | 26.3 (5.5)    | 26.3 (4.9)     | 27.5 (5.6)     | 26.2 (4.7)    | 25.9 (4.9)     | 28.4 (5.9)    | 27.9 (5.6)     | 27.9 (5.8)    | 22.9 (3.9)    | 26.3 (5.2)     |
| <b>BMI with SA categories</b>                                        |                |               |                |                   |                 |               |               |                |                |               |                |               |                |               |               |                |
| Underweight                                                          | 149,373 (1.6)  | 1,457 (1.9)   | 29,216 (2.2)   | 716 (1.8)         | 502 (1.5)       | 1,058 (3.1)   | 1,524 (2.4)   | 11,013 (2.6)   | 7,392 (2.5)    | 1,638 (2.3)   | 6,081 (2.7)    | 971 (1.2)     | 2,953 (1.6)    | 1,088 (1.6)   | 7,313 (7.0)   | 4,531 (2.1)    |
| Normal                                                               | 2739955 (29.0) | 25,222 (32.3) | 468,899 (35.0) | 11,191 (28.5)     | 8,393 (25.3)    | 12,751 (37.2) | 21,333 (33.4) | 77,106 (17.9)  | 42,148 (14.0)  | 19,632 (28.8) | 45,190 (20.4)  | 16,770 (24.6) | 44,834 (23.6)  | 16,770 (24.6) | 51,305 (49.4) | 68,911 (31.8)  |
| Overweight                                                           | 2857872 (30.2) | 24,039 (30.8) | 336,958 (25.2) | 10,301 (26.3)     | 8,952 (27.0)    | 8,310 (24.3)  | 15,338 (24.0) | 139,189 (32.2) | 82,589 (27.4)  | 23,219 (33.2) | 68,481 (30.8)  | 25,188 (30.5) | 52,978 (27.9)  | 19,104 (28.0) | 15,321 (14.7) | 56,142 (25.9)  |
| Obese I                                                              | 1474187 (15.6) | 11,174 (14.3) | 147,669 (11.0) | 5,658 (14.4)      | 4,876 (14.7)    | 3,287 (9.6)   | 6,841 (10.7)  | 87,089 (20.2)  | 70,216 (23.3)  | 13,657 (19.5) | 41,846 (18.8)  | 14,471 (17.5) | 29,867 (15.7)  | 10,571 (15.5) | 2,966 (2.9)   | 24,262 (11.2)  |
| Obese II                                                             | 575,733 (6.1)  | 3,710 (4.7)   | 51,830 (3.9)   | 2,381 (6.1)       | 1,895 (5.7)     | 2,462 (3.2)   | 2,863 (9.5)   | 26,631 (6.2)   | 3,853 (5.5)    | 12,311 (5.5)  | 5,978 (7.2)    | 11,272 (5.9)  | 4,133 (6.1)    | 630 (0.6)     | 7,725 (3.6)   | 7,725 (3.6)    |
| Obese III                                                            | 292,410 (3.1)  | 1,667 (2.1)   | 24,122 (1.8)   | 1,379 (3.5)       | 908 (2.7)       | 522 (1.5)     | 1,267 (2.0)   | 10,218 (2.4)   | 12,849 (4.3)   | 1,331 (1.9)   | 4,414 (2.0)    | 3,253 (3.9)   | 4,959 (2.6)    | 2,070 (3.0)   | 272 (0.3)     | 3,233 (1.5)    |
| Unknown                                                              | 1371879 (14.5) | 10,901 (13.9) | 279,705 (20.9) | 7,582 (19.3)      | 7,668 (23.1)    | 7,249 (21.2)  | 15,053 (23.6) | 80,568 (18.7)  | 57,669 (19.1)  | 14,535 (20.8) | 43,727 (19.7)  | 13,068 (15.8) | 43,301 (22.8)  | 14,451 (21.2) | 26,085 (25.1) | 52,092 (24.0)  |
| <b>Glycated Haemoglobin (HbA1c)</b>                                  |                |               |                |                   |                 |               |               |                |                |               |                |               |                |               |               |                |
| HbA1c %, Mean (SD)                                                   | 5.9 (1.0)      | 5.8 (0.9)     | 5.7 (0.9)      | 5.9 (1.1)         | 5.9 (1.1)       | 5.9 (1.0)     | 5.8 (1.0)     | 6.1 (1.1)      | 6.2 (1.3)      | 6.3 (1.3)     | 6.0 (1.1)      | 6.2 (1.3)     | 6.0 (1.2)      | 5.9 (1.2)     | 5.9 (0.8)     | 5.8 (1.0)      |
| HbA1c mmol/mol, Mean                                                 | 40.5 (60.8)    | 39.9 (9.8)    | 39.4 (78.0)    | 41.0 (12.5)       | 40.9 (13.1)     | 40.4 (11.4)   | 40.0 (11.3)   | 43.1 (12.4)    | 45.0 (23.5.8)  | 54.3 (660.8)  | 42.7 (106.3)   | 43.8 (13.9)   | 42.1 (136.8)   | 42.8 (222.4)  | 40.5 (9.3)    | 40.2 (11.1)    |
| <b>HbA1c category</b>                                                |                |               |                |                   |                 |               |               |                |                |               |                |               |                |               |               |                |
| <6.5%                                                                | 4112222 (43.5) | 34,093 (43.6) | 400,347 (29.9) | 13,462 (34.3)     | 10,780 (32.5)   | 10,946 (31.9) | 19,540 (30.6) | 186,388 (43.2) | 128,630 (42.7) | 25,470 (36.4) | 83,733 (37.7)  | 35,708 (43.3) | 65,250 (34.3)  | 26,176 (38.4) | 19,264 (18.5) | 73,288 (33.8)  |
| 6.5-7.4%                                                             | 323,922 (3.4)  | 2,473 (3.2)   | 23,842 (1.8)   | 1,262 (3.2)       | 948 (2.9)       | 888 (2.6)     | 1,402 (2.2)   | 19,513 (6.5)   | 5,049 (7.2)    | 10,930 (4.9)  | 6,031 (7.3)    | 6,775 (3.6)   | 2,488 (6.3)    | 6,031 (7.3)   | 1,928 (1.9)   | 5,752 (2.7)    |
| 7.5-7.9%                                                             | 87,173 (0.9)   | 656 (0.8)     | 6,329 (0.5)    | 316 (0.8)         | 217 (0.7)       | 230 (0.7)     | 381 (0.6)     | 7,323 (1.7)    | 5,597 (1.9)    | 1,426 (2.0)   | 2,771 (1.2)    | 1,318 (1.6)   | 1,493 (0.8)    | 565 (0.8)     | 412 (0.4)     | 1,413 (0.7)    |
| 8-8.9%                                                               | 95,448 (1.0)   | 642 (0.8)     | 6,972 (0.5)    | 332 (0.8)         | 240 (0.7)       | 270 (0.8)     | 384 (0.6)     | 7,379 (1.7)    | 6,478 (2.1)    | 1,582 (2.3)   | 2,873 (1.3)    | 1,349 (1.6)   | 1,643 (0.9)    | 566 (0.8)     | 357 (0.3)     | 1,608 (0.7)    |
| >9%                                                                  | 106,939 (1.1)  | 623 (0.8)     | 8,348 (0.6)    | 434 (1.2)         | 332 (1.0)       | 332 (1.0)     | 8,331 (2.8)   | 352 (1.1)      | 1,660 (2.4)    | 3,291 (1.5)   | 1,894 (2.3)    | 2,528 (1.3)   | 973 (1.5)      | 289 (0.3)     | 1,926 (0.9)   | 1,926 (0.9)    |
| Unknown                                                              | 4735705 (50.1) | 39,683 (50.8) | 892,561 (66.7) | 23,372 (59.6)     | 20,657 (62.2)   | 21,598 (63.0) | 41,573 (65.1) | 194,053 (44.9) | 132,947 (44.1) | 34,772 (49.7) | 118,452 (53.3) | 36,261 (43.9) | 112,475 (59.1) | 37,399 (54.8) | 81,642 (78.6) | 132,909 (61.3) |
| <b>Blood Pressure</b>                                                |                |               |                |                   |                 |               |               |                |                |               |                |               |                |               |               |                |
| Systolic BP, Mean (SD)                                               | 128.5 (15.4)   | 128.7 (15.9)  | 125.6 (15.6)   | 125.4 (15.4)      | 125.9 (15.5)    | 122.0 (15.0)  | 123.0 (15.2)  | 125.1 (15.5)   | 122.9 (15.2)   | 121.5 (15.0)  | 123.1 (15.1)   | 129.7 (16.1)  | 126.1 (15.9)   | 126.0 (16.0)  | 120.4 (15.6)  | 123.1 (15.3)   |
| Diastolic BP, Mean (SD)                                              | 76.8 (9.8)     | 76.3 (9.9)    | 76.7 (10.1)    | 76.9 (10.2)       | 77.5 (10.2)     | 75.7 (9.9)    | 76.2 (10.1)   | 76.9 (9.7)     | 76.2 (9.6)     | 76.1 (9.8)    | 76.4 (9.8)     | 78.4 (10.3)   | 77.9 (10.3)    | 77.8 (10.4)   | 74.8 (10.0)   | 76.1 (9.9)     |
| <b>Blood pressure four levels non-missing</b>                        |                |               |                |                   |                 |               |               |                |                |               |                |               |                |               |               |                |
| Normal                                                               | 1497296 (15.8) | 12,377 (15.8) | 209,735 (15.7) | 7,562 (19.3)      | 5,505 (16.6)    | 7,296 (21.3)  | 12,348 (19.3) | 79,664 (18.4)  | 68,793 (22.8)  | 17,455 (25.0) | 45,183 (20.3)  | 12,224 (14.8) | 32,219 (16.9)  | 12,343 (18.1) | 15,902 (15.3) | 41,573 (19.2)  |
| Elevated                                                             | 1103213 (11.7) | 8,540 (10.9)  | 114,007 (8.5)  | 4,094 (10.4)      | 2,897 (8.7)     | 3,103 (9.1)   | 5,619 (8.8)   | 40,439 (9.4)   | 31,675 (10.5)  | 6,883 (9.8)   | 20,294 (9.1)   | 8,643 (10.5)  | 17,108 (9.0)   | 6,342 (9.3)   | 5,315 (5.1)   | 18,283 (8.4)   |
| High Stage I                                                         | 2600655 (27.5) | 19,636 (25.1) | 259,844 (19.4) | 9,003 (23.0)      | 7,232 (21.8)    | 6,682 (19.5)  | 12,237 (19.2) | 102,809 (23.8) | 71,601 (23.7)  | 16,385 (23.4) | 48,167 (21.7)  | 26,648 (27.5) | 41,924 (22.0)  | 15,997 (23.5) | 11,840 (11.4) | 41,618 (19.2)  |
| High Stage II                                                        | 1850569 (19.6) | 14,717 (18.8) | 160,109 (12.0) | 5,444 (13.9)      | 4,389 (13.2)    | 3,038 (8.9)   | 6,137 (9.6)   | 56,534 (13.1)  | 33,732 (11.2)  | 7,178 (10.3)  | 22,957 (10.3)  | 17,554 (21.3) | 26,445 (13.9)  | 10,018 (14.7) | 5,436 (5.2)   | 20,997 (9.7)   |
| Unknown                                                              | 2409676 (25.5) | 22,900 (29.3) | 594,704 (44.4) | 13,105 (33.4)     | 13,171 (39.7)   | 14,145 (41.3) | 27,477 (43.1) | 152,368 (35.3) | 95,695 (31.7)  | 22,058 (31.5) | 85,44          |               |                |               |               |                |

Table S2. Comparison of characteristics of the general population vs. those receiving a test for SARS-CoV-2 in waves 1 and 2

|                                               |                  | Wave 1      |                   | Wave 2      |                   |
|-----------------------------------------------|------------------|-------------|-------------------|-------------|-------------------|
|                                               |                  | Denominator | Tested Population | Denominator | Tested Population |
|                                               |                  | 17,288,532  | 1,700,196         | 17,636,366  | 2,647,756         |
| <b>Age (years)</b>                            | Mean (SD)        | 49.8 (18.7) | 51.3 (19.9)       | 49.7 (18.7) | 46.6 (18.5)       |
| <b>Sex</b>                                    | Male             | 49.9%       | 41.4%             | 50          | 44.0%             |
| <b>Ethnic group</b>                           | White            | 64.3%       | 66.8%             | 64.2%       | 65.5%             |
|                                               | South Asian      | 5.9%        | 6.2%              | 6.0%        | 6.3%              |
|                                               | Black            | 2.0%        | 2.0%              | 2.0%        | 1.8%              |
|                                               | Mixed            | 1.0%        | 1.0%              | 1.0%        | 1.0%              |
|                                               | Other            | 1.9%        | 1.2%              | 1.9%        | 1.2%              |
|                                               | Unknown          | 25.0%       | 22.7%             | 24.8%       | 24.2%             |
| <b>Index of Multiple Deprivation Quintile</b> | Q1               | 20.4%       | 19.4%             | 20.4%       | 20.7%             |
|                                               | Q2               | 20.1%       | 19.7%             | 20.1%       | 19.8%             |
|                                               | Q3               | 20.1%       | 20.2%             | 20.4%       | 19.9%             |
|                                               | Q4               | 20.0%       | 20.8%             | 20.0%       | 20.0%             |
|                                               | Q5               | 19.3%       | 19.9%             | 19.1%       | 19.5%             |
| <b>Geographic Region</b>                      | East Midlands    | 23.2%       | 23.1%             | 23.2%       | 24.7%             |
|                                               | East of England  | 17.5%       | 19.2%             | 17.5%       | 17.1%             |
|                                               | London           | 6.8%        | 5.3%              | 7.0%        | 6.1%              |
|                                               | North East       | 4.6%        | 5.6%              | 4.6%        | 4.9%              |
|                                               | North West       | 8.9%        | 8.5%              | 8.8%        | 9.9%              |
|                                               | South East       | 6.7%        | 6.9%              | 6.7%        | 5.9%              |
|                                               | West Midlands    | 13.9%       | 14.1%             | 14.0%       | 11.7%             |
|                                               | Yorkshire/Humber | 4.0%        | 3.6%              | 4.0%        | 4.4%              |
| <b>Count of co-morbid conditions</b>          | Mean (SD)        | 0.6 (0.9)   | 0.9 (1.1)         | 0.6 (0.9)   | 0.7 (0.9)         |

Table S3. Association between ethnicity in 5 categories and non-COVID-19 related mortality wave 1 (serial adjustment)

|                                          | Denominator | Event  | Total person-weeks | Rate per 1,000 person-weeks | Crude |               | Age-Sex Adjusted |               | plus Deprivation |               | Plus Co-morbidities and Clinical Factors |               | plus household size |               |
|------------------------------------------|-------------|--------|--------------------|-----------------------------|-------|---------------|------------------|---------------|------------------|---------------|------------------------------------------|---------------|---------------------|---------------|
|                                          |             |        |                    |                             | HR    | 95% CI        | HR               | 95% CI        | HR               | 95% CI        | HR                                       | 95% CI        | HR                  | 95% CI        |
| <b>Non COVID-19 mortality (n=71,920)</b> |             |        |                    |                             |       |               |                  |               |                  |               |                                          |               |                     |               |
| White                                    | 10,877,978  | 48,100 | 285,149,111        | 0.17                        | 1     |               | 1                |               | 1                |               | 1                                        |               | 1                   |               |
| South Asian                              | 1,025,319   | 1,723  | 26,916,194         | 0.06                        | 0.42  | (0.40 - 0.44) | 0.87             | (0.83 - 0.91) | 0.79             | (0.75 - 0.83) | 0.91                                     | (0.86 - 0.95) | 0.85                | (0.81 - 0.90) |
| Black                                    | 340,912     | 606    | 8,948,563          | 0.07                        | 0.45  | (0.41 - 0.48) | 0.89             | (0.82 - 0.97) | 0.78             | (0.72 - 0.85) | 0.85                                     | (0.78 - 0.92) | 0.85                | (0.78 - 0.92) |
| Mixed                                    | 170,484     | 178    | 4,477,775          | 0.04                        | 0.26  | (0.22 - 0.30) | 0.8              | (0.69 - 0.92) | 0.74             | (0.64 - 0.86) | 0.81                                     | (0.70 - 0.94) | 0.81                | (0.70 - 0.93) |
| Other                                    | 320,788     | 296    | 8,426,262          | 0.04                        | 0.23  | (0.21 - 0.26) | 0.66             | (0.59 - 0.74) | 0.63             | (0.56 - 0.70) | 0.69                                     | (0.62 - 0.77) | 0.68                | (0.61 - 0.77) |
| Unknown                                  | 4,553,051   | 21,017 | 119,337,957        | 0.18                        | 1.04  | (1.02 - 1.06) | 0.98             | (0.97 - 1.00) | 0.99             | (0.97 - 1.01) | 1.05                                     | (1.04 - 1.07) | 1.06                | (1.04 - 1.08) |

\*Any counts <5 are set to 5 per data disclosure agreements

Table S4. Association between ethnicity in 16 categories and COVID-19 outcomes in wave 1 (serial adjustment)

|                   | Denominator | Event          | Crude |               | Age-Sex Adjusted |               | plus Deprivation |               | Plus Co-morbidities and Clinical Factors |               | plus household size |               |
|-------------------|-------------|----------------|-------|---------------|------------------|---------------|------------------|---------------|------------------------------------------|---------------|---------------------|---------------|
|                   |             |                | HR    | 95% CI        | HR               | 95% CI        | HR               | 95% CI        | HR                                       | 95% CI        | HR                  | 95% CI        |
| <b>tested</b>     |             | <b>1216801</b> |       |               |                  |               |                  |               |                                          |               |                     |               |
| British           | 9461409     | 713121         | 1     |               | 1                |               | 1                |               | 1                                        |               | 1                   |               |
| Irish             | 78170       | 6160           | 1.08  | (1.06 - 1.11) | 1.06             | (1.04 - 1.09) | 1.05             | (1.03 - 1.08) | 1.06                                     | (1.04 - 1.09) | 1.06                | (1.04 - 1.09) |
| Other White       | 1338399     | 73900          | 0.74  | (0.73 - 0.75) | 0.74             | (0.74 - 0.75) | 0.73             | (0.73 - 0.74) | 0.81                                     | (0.80 - 0.81) | 0.8                 | (0.80 - 0.81) |
| White + Caribbean | 39208       | 2838           | 0.97  | (0.94 - 1.01) | 0.99             | (0.95 - 1.03) | 0.96             | (0.93 - 1.00) | 0.96                                     | (0.92 - 0.99) | 0.96                | (0.92 - 0.99) |
| White + African   | 33194       | 2619           | 1.06  | (1.02 - 1.10) | 1.1              | (1.06 - 1.14) | 1.07             | (1.03 - 1.11) | 1.15                                     | (1.11 - 1.19) | 1.15                | (1.10 - 1.19) |
| White + Asian     | 34264       | 2608           | 1.01  | (0.97 - 1.05) | 1.04             | (1.00 - 1.08) | 1.03             | (1.00 - 1.08) | 1.08                                     | (1.04 - 1.12) | 1.07                | (1.03 - 1.12) |
| Other mixed       | 63818       | 4061           | 0.86  | (0.84 - 0.89) | 0.88             | (0.86 - 0.91) | 0.87             | (0.84 - 0.90) | 0.92                                     | (0.89 - 0.95) | 0.91                | (0.89 - 0.94) |
| Indian            | 431814      | 40231          | 1.13  | (1.12 - 1.14) | 1.15             | (1.14 - 1.17) | 1.13             | (1.12 - 1.14) | 1.17                                     | (1.16 - 1.18) | 1.15                | (1.14 - 1.16) |
| Pakistani         | 301496      | 21952          | 0.99  | (0.98 - 1.01) | 1.02             | (1.00 - 1.03) | 0.97             | (0.96 - 0.99) | 0.95                                     | (0.94 - 0.96) | 0.94                | (0.93 - 0.96) |
| Bangladeshi       | 69959       | 3924           | 0.73  | (0.70 - 0.75) | 0.75             | (0.72 - 0.77) | 0.71             | (0.69 - 0.74) | 0.7                                      | (0.68 - 0.72) | 0.7                 | (0.67 - 0.72) |
| Other Asian       | 222050      | 16540          | 1.01  | (1.00 - 1.03) | 1.04             | (1.02 - 1.05) | 1.01             | (1.00 - 1.03) | 1.07                                     | (1.05 - 1.08) | 1.06                | (1.04 - 1.07) |
| Caribbean         | 82561       | 5972           | 1     | (0.97 - 1.03) | 1                | (0.98 - 1.03) | 0.97             | (0.94 - 0.99) | 0.97                                     | (0.95 - 1.00) | 0.97                | (0.95 - 1.00) |
| African           | 190164      | 14623          | 1.02  | (1.00 - 1.04) | 1.06             | (1.04 - 1.08) | 1.02             | (1.00 - 1.04) | 1.1                                      | (1.08 - 1.12) | 1.09                | (1.08 - 1.11) |
| Other Black       | 68187       | 4710           | 0.93  | (0.90 - 0.96) | 0.97             | (0.94 - 1.00) | 0.93             | (0.91 - 0.96) | 0.97                                     | (0.94 - 0.99) | 0.96                | (0.94 - 0.99) |
| Chinese           | 103892      | 2899           | 0.36  | (0.34 - 0.37) | 0.37             | (0.35 - 0.38) | 0.37             | (0.35 - 0.38) | 0.46                                     | (0.44 - 0.47) | 0.45                | (0.43 - 0.46) |

|         |         |        |      |               |      |               |      |               |      |               |      |               |
|---------|---------|--------|------|---------------|------|---------------|------|---------------|------|---------------|------|---------------|
| Other   | 216896  | 12925  | 0.8  | (0.79 - 0.82) | 0.83 | (0.81 - 0.84) | 0.81 | (0.80 - 0.82) | 0.88 | (0.86 - 0.89) | 0.87 | (0.86 - 0.89) |
| Unknown | 4553051 | 287718 | 0.84 | (0.83 - 0.84) | 0.86 | (0.85 - 0.86) | 0.86 | (0.85 - 0.86) | 0.95 | (0.95 - 0.96) | 0.95 | (0.95 - 0.96) |

---

**positivetest** **71246**

---

|                   |         |       |      |               |      |               |      |               |      |               |      |               |
|-------------------|---------|-------|------|---------------|------|---------------|------|---------------|------|---------------|------|---------------|
| British           | 9461409 | 36214 | 1    |               | 1    |               | 1    |               | 1    |               | 1    |               |
| Irish             | 78170   | 335   | 1.24 | (1.11 - 1.38) | 1.17 | (1.05 - 1.30) | 1.14 | (1.03 - 1.27) | 1.16 | (1.04 - 1.29) | 1.15 | (1.04 - 1.29) |
| Other White       | 1338399 | 4631  | 0.99 | (0.96 - 1.02) | 1.09 | (1.06 - 1.13) | 1.04 | (1.01 - 1.08) | 1.15 | (1.12 - 1.19) | 1.12 | (1.08 - 1.16) |
| White + Caribbean | 39208   | 171   | 1.17 | (1.01 - 1.36) | 1.35 | (1.16 - 1.57) | 1.26 | (1.09 - 1.47) | 1.25 | (1.07 - 1.45) | 1.24 | (1.07 - 1.45) |
| White + African   | 33194   | 223   | 1.82 | (1.60 - 2.08) | 2.16 | (1.89 - 2.46) | 2.01 | (1.76 - 2.29) | 1.99 | (1.74 - 2.27) | 1.92 | (1.69 - 2.20) |
| White + Asian     | 34264   | 192   | 1.55 | (1.34 - 1.78) | 1.84 | (1.60 - 2.12) | 1.8  | (1.56 - 2.08) | 1.82 | (1.58 - 2.10) | 1.77 | (1.53 - 2.04) |
| Other mixed       | 63818   | 254   | 1.15 | (1.01 - 1.30) | 1.36 | (1.20 - 1.54) | 1.3  | (1.15 - 1.47) | 1.35 | (1.19 - 1.53) | 1.32 | (1.17 - 1.49) |
| Indian            | 431814  | 4035  | 2.36 | (2.28 - 2.45) | 2.6  | (2.51 - 2.69) | 2.46 | (2.37 - 2.55) | 2.24 | (2.17 - 2.33) | 2.08 | (2.00 - 2.15) |
| Pakistani         | 301496  | 3466  | 2.65 | (2.56 - 2.75) | 3.02 | (2.91 - 3.13) | 2.7  | (2.60 - 2.80) | 2.29 | (2.21 - 2.38) | 2.07 | (1.99 - 2.15) |
| Bangladeshi       | 69959   | 366   | 1.33 | (1.20 - 1.48) | 1.55 | (1.39 - 1.72) | 1.38 | (1.24 - 1.53) | 1.2  | (1.08 - 1.33) | 1.1  | (0.99 - 1.22) |
| Other Asian       | 222050  | 1812  | 2.32 | (2.21 - 2.43) | 2.66 | (2.54 - 2.79) | 2.51 | (2.40 - 2.64) | 2.38 | (2.27 - 2.50) | 2.24 | (2.13 - 2.35) |
| Caribbean         | 82561   | 530   | 1.78 | (1.64 - 1.94) | 1.8  | (1.65 - 1.96) | 1.64 | (1.50 - 1.78) | 1.54 | (1.41 - 1.68) | 1.53 | (1.40 - 1.67) |
| African           | 190164  | 1390  | 1.95 | (1.85 - 2.06) | 2.31 | (2.19 - 2.44) | 2.09 | (1.97 - 2.20) | 2    | (1.89 - 2.11) | 1.91 | (1.80 - 2.02) |
| Other Black       | 68187   | 366   | 1.48 | (1.33 - 1.64) | 1.74 | (1.57 - 1.93) | 1.59 | (1.43 - 1.76) | 1.53 | (1.38 - 1.69) | 1.48 | (1.33 - 1.64) |
| Chinese           | 103892  | 140   | 0.37 | (0.31 - 0.44) | 0.45 | (0.38 - 0.53) | 0.45 | (0.38 - 0.53) | 0.52 | (0.44 - 0.61) | 0.49 | (0.42 - 0.58) |
| Other             | 216896  | 1073  | 1.4  | (1.31 - 1.48) | 1.62 | (1.52 - 1.72) | 1.52 | (1.43 - 1.62) | 1.6  | (1.50 - 1.70) | 1.53 | (1.44 - 1.63) |
| Unknown           | 4553051 | 16048 | 0.97 | (0.95 - 0.99) | 1    | (0.99 - 1.02) | 1.01 | (0.99 - 1.02) | 1.08 | (1.06 - 1.10) | 1.07 | (1.05 - 1.09) |

---

**Hospital Admission (n=32,473)**

---

|                   |         |       |      |               |      |               |      |               |      |               |      |               |
|-------------------|---------|-------|------|---------------|------|---------------|------|---------------|------|---------------|------|---------------|
| British           | 9683276 | 18627 | 1    |               | 1    |               | 1    |               | 1    |               | 1    |               |
| Irish             | 79945   | 257   | 1.47 | (1.30 - 1.67) | 1.23 | (1.09 - 1.40) | 1.16 | (1.03 - 1.31) | 1.14 | (1.01 - 1.29) | 1.14 | (1.00 - 1.29) |
| Other White       | 1347091 | 1620  | 0.58 | (0.55 - 0.61) | 1.01 | (0.96 - 1.06) | 0.96 | (0.91 - 1.01) | 1.06 | (1.00 - 1.11) | 1.04 | (0.99 - 1.10) |
| White + Caribbean | 39631   | 79    | 0.87 | (0.70 - 1.08) | 1.68 | (1.35 - 2.09) | 1.49 | (1.20 - 1.87) | 1.43 | (1.15 - 1.79) | 1.43 | (1.14 - 1.78) |
| White + African   | 33438   | 65    | 0.9  | (0.70 - 1.14) | 2.03 | (1.59 - 2.59) | 1.81 | (1.42 - 2.32) | 1.92 | (1.50 - 2.45) | 1.86 | (1.46 - 2.38) |
| White + Asian     | 34629   | 63    | 0.87 | (0.68 - 1.11) | 2.03 | (1.59 - 2.61) | 1.96 | (1.53 - 2.51) | 2.02 | (1.58 - 2.59) | 1.98 | (1.55 - 2.54) |
| Other mixed       | 64235   | 95    | 0.68 | (0.56 - 0.84) | 1.61 | (1.32 - 1.97) | 1.51 | (1.23 - 1.85) | 1.58 | (1.29 - 1.94) | 1.55 | (1.27 - 1.90) |
| Indian            | 432760  | 1179  | 1.14 | (1.08 - 1.22) | 1.75 | (1.65 - 1.86) | 1.62 | (1.52 - 1.73) | 1.48 | (1.39 - 1.58) | 1.41 | (1.32 - 1.50) |
| Pakistani         | 300528  | 924   | 1.29 | (1.21 - 1.38) | 2.47 | (2.31 - 2.64) | 2.07 | (1.93 - 2.22) | 1.65 | (1.54 - 1.76) | 1.48 | (1.38 - 1.59) |
| Bangladeshi       | 70395   | 153   | 0.89 | (0.76 - 1.04) | 1.97 | (1.68 - 2.31) | 1.63 | (1.39 - 1.92) | 1.34 | (1.14 - 1.57) | 1.21 | (1.03 - 1.42) |
| Other Asian       | 222868  | 580   | 1.17 | (1.07 - 1.27) | 2.23 | (2.05 - 2.43) | 2.05 | (1.88 - 2.23) | 1.95 | (1.79 - 2.12) | 1.85 | (1.70 - 2.02) |

|             |         |      |      |               |      |               |      |               |      |               |      |               |
|-------------|---------|------|------|---------------|------|---------------|------|---------------|------|---------------|------|---------------|
| Caribbean   | 83042   | 393  | 1.92 | (1.74 - 2.13) | 1.96 | (1.77 - 2.17) | 1.68 | (1.52 - 1.86) | 1.58 | (1.43 - 1.75) | 1.58 | (1.43 - 1.75) |
| African     | 190395  | 499  | 1.12 | (1.02 - 1.23) | 2.51 | (2.29 - 2.75) | 2.15 | (1.96 - 2.35) | 2.19 | (2.00 - 2.40) | 2.1  | (1.91 - 2.30) |
| Other Black | 69124   | 159  | 0.98 | (0.84 - 1.15) | 1.98 | (1.69 - 2.31) | 1.72 | (1.47 - 2.01) | 1.67 | (1.43 - 1.96) | 1.63 | (1.39 - 1.90) |
| Chinese     | 104560  | 70   | 0.31 | (0.25 - 0.39) | 0.76 | (0.60 - 0.96) | 0.75 | (0.60 - 0.95) | 1    | (0.79 - 1.26) | 0.97 | (0.77 - 1.23) |
| Other       | 218969  | 434  | 0.91 | (0.83 - 1.01) | 1.82 | (1.65 - 2.00) | 1.67 | (1.52 - 1.85) | 1.79 | (1.62 - 1.97) | 1.74 | (1.58 - 1.91) |
| Unknown     | 4408386 | 7276 | 0.86 | (0.84 - 0.89) | 0.97 | (0.94 - 0.99) | 0.97 | (0.94 - 0.99) | 1.07 | (1.04 - 1.10) | 1.07 | (1.04 - 1.10) |

**ICU admission (N=3,091)**

|                   |         |      |      |               |      |               |      |               |      |               |      |               |
|-------------------|---------|------|------|---------------|------|---------------|------|---------------|------|---------------|------|---------------|
| British           | 9461409 | 1500 | 1    |               | 1    |               | 1    |               | 1    |               | 1    |               |
| Irish             | 78170   | 10   | 0.37 | (0.15 - 0.88) | 0.37 | (0.15 - 0.88) | 0.36 | (0.15 - 0.86) | 0.38 | (0.16 - 0.91) | 0.38 | (0.16 - 0.91) |
| Other White       | 1338399 | 190  | 0.83 | (0.71 - 0.97) | 1.31 | (1.12 - 1.53) | 1.25 | (1.07 - 1.47) | 1.46 | (1.25 - 1.71) | 1.43 | (1.23 - 1.68) |
| White + Caribbean | 39208   | 11   | 1.61 | (0.89 - 2.91) | 2.63 | (1.45 - 4.77) | 2.44 | (1.34 - 4.42) | 2.34 | (1.29 - 4.24) | 2.32 | (1.28 - 4.21) |
| White + African   | 33194   | 21   | 3.6  | (2.34 - 5.55) | 5.72 | (3.71 - 8.81) | 5.25 | (3.40 - 8.09) | 5.08 | (3.30 - 7.84) | 4.93 | (3.19 - 7.60) |
| White + Asian     | 34264   | 10   | 1.74 | (0.94 - 3.25) | 3.18 | (1.70 - 5.92) | 3.1  | (1.66 - 5.77) | 3.39 | (1.82 - 6.32) | 3.31 | (1.77 - 6.17) |
| Other mixed       | 63818   | 14   | 1.27 | (0.75 - 2.15) | 2.34 | (1.38 - 3.97) | 2.23 | (1.31 - 3.78) | 2.39 | (1.41 - 4.06) | 2.34 | (1.38 - 3.97) |
| Indian            | 431814  | 161  | 2.19 | (1.84 - 2.60) | 2.93 | (2.46 - 3.48) | 2.78 | (2.33 - 3.30) | 2.23 | (1.87 - 2.67) | 2.1  | (1.76 - 2.52) |
| Pakistani         | 301496  | 118  | 2.21 | (1.82 - 2.68) | 3.54 | (2.92 - 4.30) | 3.13 | (2.57 - 3.81) | 2.21 | (1.81 - 2.69) | 2.03 | (1.65 - 2.49) |
| Bangladeshi       | 69959   | 25   | 1.96 | (1.31 - 2.91) | 3.51 | (2.35 - 5.22) | 3.08 | (2.06 - 4.60) | 2.46 | (1.65 - 3.68) | 2.27 | (1.52 - 3.41) |
| Other Asian       | 222050  | 106  | 2.71 | (2.21 - 3.31) | 4.18 | (3.41 - 5.14) | 3.93 | (3.20 - 4.83) | 3.36 | (2.73 - 4.14) | 3.19 | (2.59 - 3.94) |
| Caribbean         | 82561   | 41   | 2.66 | (1.94 - 3.65) | 2.77 | (2.02 - 3.79) | 2.5  | (1.83 - 3.43) | 2.31 | (1.68 - 3.17) | 2.3  | (1.68 - 3.16) |
| African           | 190164  | 118  | 3.39 | (2.80 - 4.11) | 5.26 | (4.33 - 6.38) | 4.69 | (3.86 - 5.71) | 4.37 | (3.58 - 5.33) | 4.2  | (3.44 - 5.12) |
| Other Black       | 68187   | 27   | 2.15 | (1.47 - 3.16) | 3.05 | (2.08 - 4.48) | 2.77 | (1.89 - 4.07) | 2.62 | (1.78 - 3.84) | 2.55 | (1.74 - 3.75) |
| Chinese           | 103892  | 18   | 1.01 | (0.64 - 1.62) | 2.03 | (1.27 - 3.24) | 2.02 | (1.27 - 3.23) | 3.3  | (2.06 - 5.26) | 3.21 | (2.01 - 5.12) |
| Other             | 216896  | 79   | 2.12 | (1.68 - 2.67) | 3.4  | (2.70 - 4.29) | 3.2  | (2.53 - 4.04) | 3.52 | (2.79 - 4.45) | 3.41 | (2.70 - 4.31) |
| Unknown           | 4553051 | 662  | 0.92 | (0.84 - 1.01) | 1.05 | (0.96 - 1.15) | 1.05 | (0.96 - 1.15) | 1.12 | (1.02 - 1.23) | 1.12 | (1.02 - 1.23) |

**onscoviddeath**

**11649**

|                   |         |      |      |               |      |               |      |               |      |               |      |               |
|-------------------|---------|------|------|---------------|------|---------------|------|---------------|------|---------------|------|---------------|
| British           | 9461409 | 6992 | 1    |               | 1    |               | 1    |               | 1    |               | 1    |               |
| Irish             | 78170   | 86   | 1.31 | (1.06 - 1.62) | 1.03 | (0.83 - 1.27) | 0.96 | (0.77 - 1.19) | 0.92 | (0.74 - 1.14) | 0.92 | (0.74 - 1.14) |
| Other White       | 1338399 | 436  | 0.41 | (0.37 - 0.45) | 0.9  | (0.82 - 1.00) | 0.87 | (0.79 - 0.96) | 0.91 | (0.83 - 1.01) | 0.91 | (0.82 - 1.00) |
| White + Caribbean | 39208   | 28   | 0.83 | (0.57 - 1.20) | 2.02 | (1.39 - 2.93) | 1.77 | (1.22 - 2.57) | 1.62 | (1.11 - 2.35) | 1.62 | (1.12 - 2.36) |
| White + African   | 33194   | 9    | 0.33 | (0.17 - 0.63) | 1.32 | (0.69 - 2.54) | 1.18 | (0.61 - 2.27) | 1.31 | (0.68 - 2.52) | 1.26 | (0.65 - 2.42) |
| White + Asian     | 34264   | 9    | 0.33 | (0.17 - 0.63) | 1.25 | (0.65 - 2.41) | 1.2  | (0.62 - 2.31) | 1.23 | (0.64 - 2.36) | 1.21 | (0.63 - 2.33) |
| Other mixed       | 63818   | 19   | 0.35 | (0.23 - 0.55) | 1.37 | (0.87 - 2.16) | 1.28 | (0.81 - 2.01) | 1.33 | (0.84 - 2.08) | 1.31 | (0.84 - 2.06) |



|             |         |      |      |               |      |               |      |               |      |               |      |               |
|-------------|---------|------|------|---------------|------|---------------|------|---------------|------|---------------|------|---------------|
| Indian      | 431814  | 335  | 0.86 | (0.76 - 0.96) | 1.59 | (1.42 - 1.79) | 1.46 | (1.30 - 1.64) | 1.41 | (1.25 - 1.58) | 1.29 | (1.14 - 1.45) |
| Pakistani   | 301496  | 210  | 0.79 | (0.69 - 0.91) | 2.07 | (1.80 - 2.38) | 1.69 | (1.47 - 1.94) | 1.35 | (1.17 - 1.55) | 1.03 | (0.89 - 1.19) |
| Bangladeshi | 69959   | 49   | 0.78 | (0.59 - 1.03) | 2.7  | (2.04 - 3.59) | 2.19 | (1.65 - 2.91) | 1.68 | (1.26 - 2.22) | 1.29 | (0.97 - 1.71) |
| Other Asian | 222050  | 140  | 0.72 | (0.60 - 0.85) | 1.96 | (1.65 - 2.33) | 1.79 | (1.51 - 2.13) | 1.72 | (1.45 - 2.05) | 1.57 | (1.32 - 1.87) |
| Caribbean   | 82561   | 137  | 1.74 | (1.46 - 2.06) | 1.65 | (1.39 - 1.96) | 1.4  | (1.18 - 1.67) | 1.27 | (1.07 - 1.51) | 1.33 | (1.12 - 1.58) |
| African     | 190164  | 91   | 0.53 | (0.43 - 0.66) | 2.17 | (1.76 - 2.68) | 1.84 | (1.49 - 2.27) | 1.86 | (1.51 - 2.30) | 1.77 | (1.43 - 2.19) |
| Other Black | 68187   | 40   | 0.64 | (0.47 - 0.88) | 2.05 | (1.50 - 2.80) | 1.77 | (1.29 - 2.42) | 1.67 | (1.22 - 2.28) | 1.61 | (1.18 - 2.20) |
| Chinese     | 103892  | 20   | 0.24 | (0.15 - 0.37) | 0.88 | (0.57 - 1.37) | 0.86 | (0.55 - 1.33) | 1.03 | (0.67 - 1.61) | 1.05 | (0.67 - 1.63) |
| Other       | 216896  | 87   | 0.47 | (0.38 - 0.58) | 1.35 | (1.09 - 1.68) | 1.25 | (1.01 - 1.55) | 1.28 | (1.03 - 1.59) | 1.26 | (1.01 - 1.56) |
| Unknown     | 4553051 | 2961 | 0.88 | (0.84 - 0.92) | 0.91 | (0.87 - 0.95) | 0.92 | (0.88 - 0.96) | 0.99 | (0.95 - 1.04) | 1.01 | (0.96 - 1.05) |

| <b>ons_noncoviddeath</b> |         | <b>71920</b> |      |               |      |               |      |               |      |               |      |               |
|--------------------------|---------|--------------|------|---------------|------|---------------|------|---------------|------|---------------|------|---------------|
| British                  | 9461409 | 45049        | 1    |               | 1    |               | 1    |               | 1    |               | 1    |               |
| Irish                    | 78170   | 475          | 1.39 | (1.27 - 1.53) | 1.13 | (1.03 - 1.24) | 1.07 | (0.98 - 1.18) | 1    | (0.92 - 1.10) | 1    | (0.91 - 1.09) |
| Other White              | 1338399 | 2576         | 0.43 | (0.42 - 0.45) | 0.92 | (0.89 - 0.96) | 0.9  | (0.86 - 0.93) | 0.94 | (0.90 - 0.97) | 0.93 | (0.89 - 0.97) |
| White + Caribbean        | 39208   | 75           | 0.42 | (0.34 - 0.53) | 1.06 | (0.84 - 1.33) | 0.95 | (0.76 - 1.19) | 1    | (0.80 - 1.25) | 1    | (0.80 - 1.26) |
| White + African          | 33194   | 30           | 0.2  | (0.14 - 0.29) | 0.78 | (0.54 - 1.11) | 0.71 | (0.50 - 1.02) | 0.86 | (0.60 - 1.23) | 0.84 | (0.59 - 1.21) |
| White + Asian            | 34264   | 25           | 0.16 | (0.11 - 0.24) | 0.62 | (0.42 - 0.91) | 0.6  | (0.40 - 0.89) | 0.65 | (0.44 - 0.96) | 0.64 | (0.43 - 0.95) |
| Other mixed              | 63818   | 48           | 0.17 | (0.13 - 0.23) | 0.64 | (0.48 - 0.85) | 0.61 | (0.46 - 0.81) | 0.66 | (0.50 - 0.88) | 0.66 | (0.49 - 0.87) |
| Indian                   | 431814  | 846          | 0.45 | (0.42 - 0.48) | 0.84 | (0.78 - 0.90) | 0.78 | (0.73 - 0.84) | 0.95 | (0.88 - 1.02) | 0.92 | (0.85 - 0.98) |
| Pakistani                | 301496  | 523          | 0.38 | (0.35 - 0.42) | 0.96 | (0.88 - 1.05) | 0.81 | (0.74 - 0.88) | 0.87 | (0.80 - 0.95) | 0.78 | (0.71 - 0.85) |
| Bangladeshi              | 69959   | 91           | 0.29 | (0.24 - 0.36) | 0.97 | (0.79 - 1.19) | 0.82 | (0.66 - 1.00) | 0.82 | (0.67 - 1.01) | 0.73 | (0.59 - 0.90) |
| Other Asian              | 222050  | 263          | 0.28 | (0.25 - 0.31) | 0.77 | (0.68 - 0.87) | 0.71 | (0.63 - 0.81) | 0.86 | (0.76 - 0.97) | 0.83 | (0.74 - 0.94) |
| Caribbean                | 82561   | 346          | 0.96 | (0.86 - 1.06) | 0.93 | (0.83 - 1.03) | 0.81 | (0.73 - 0.90) | 0.84 | (0.75 - 0.93) | 0.85 | (0.76 - 0.95) |
| African                  | 190164  | 161          | 0.19 | (0.17 - 0.23) | 0.76 | (0.65 - 0.89) | 0.67 | (0.57 - 0.78) | 0.82 | (0.71 - 0.96) | 0.8  | (0.68 - 0.93) |
| Other Black              | 68187   | 99           | 0.33 | (0.27 - 0.40) | 0.99 | (0.81 - 1.21) | 0.88 | (0.72 - 1.07) | 0.91 | (0.75 - 1.11) | 0.89 | (0.73 - 1.09) |
| Chinese                  | 103892  | 56           | 0.12 | (0.09 - 0.16) | 0.44 | (0.34 - 0.57) | 0.43 | (0.33 - 0.56) | 0.52 | (0.40 - 0.68) | 0.52 | (0.40 - 0.68) |
| Other                    | 216896  | 240          | 0.25 | (0.22 - 0.29) | 0.73 | (0.65 - 0.83) | 0.69 | (0.61 - 0.78) | 0.74 | (0.65 - 0.84) | 0.73 | (0.64 - 0.83) |
| Unknown                  | 4553051 | 21017        | 0.98 | (0.96 - 0.99) | 0.98 | (0.96 - 0.99) | 0.99 | (0.97 - 1.00) | 1.05 | (1.03 - 1.07) | 1.06 | (1.04 - 1.08) |

\*Any counts <5 are set to 5 per data disclosure agreements

Table S5. Association between ethnicity in 5 categories and COVID-19 outcomes in wave 2 (serial adjustment)

|                                      | Denominator | Event   | Crude |               | Age-Sex Adjusted |               | Plus Deprivation |               | Plus Co-morbidities and Clinical Factors |               | Plus Household size |               |
|--------------------------------------|-------------|---------|-------|---------------|------------------|---------------|------------------|---------------|------------------------------------------|---------------|---------------------|---------------|
|                                      |             |         | HR    | 95% CI        | HR               | 95% CI        | HR               | 95% CI        | HR                                       | 95% CI        | HR                  | 95% CI        |
| <b>Tested (n=2,647,756)</b>          |             |         |       |               |                  |               |                  |               |                                          |               |                     |               |
| White                                | 11323083    | 1733272 | 1     |               | 1                |               | 1                |               | 1                                        |               | 1                   |               |
| South Asian                          | 1061336     | 166856  | 1.03  | (1.02 - 1.03) | 0.96             | (0.95 - 0.96) | 0.97             | (0.96 - 0.97) | 0.96                                     | (0.95 - 0.96) | 0.96                | (0.95 - 0.96) |
| Black                                | 355625      | 48068   | 0.86  | (0.85 - 0.87) | 0.81             | (0.80 - 0.81) | 0.82             | (0.81 - 0.83) | 0.83                                     | (0.82 - 0.84) | 0.83                | (0.82 - 0.84) |
| Mixed                                | 179557      | 26679   | 0.98  | (0.96 - 0.99) | 0.87             | (0.86 - 0.88) | 0.88             | (0.87 - 0.89) | 0.89                                     | (0.88 - 0.90) | 0.9                 | (0.88 - 0.91) |
| Other                                | 334962      | 32904   | 0.64  | (0.64 - 0.65) | 0.58             | (0.58 - 0.59) | 0.58             | (0.58 - 0.59) | 0.64                                     | (0.63 - 0.64) | 0.64                | (0.64 - 0.65) |
| Unknown                              | 4381803     | 639977  | 0.95  | (0.94 - 0.95) | 0.92             | (0.92 - 0.92) | 0.92             | (0.92 - 0.92) | 0.99                                     | (0.99 - 1.00) | 0.99                | (0.99 - 0.99) |
| <b>Positive test (n=506,773)</b>     |             |         |       |               |                  |               |                  |               |                                          |               |                     |               |
| White                                | 11323083    | 307983  | 1     |               | 1                |               | 1                |               | 1                                        |               | 1                   |               |
| South Asian                          | 1061336     | 50858   | 1.67  | (1.66 - 1.69) | 1.51             | (1.50 - 1.53) | 1.51             | (1.49 - 1.52) | 1.38                                     | (1.36 - 1.39) | 1.32                | (1.31 - 1.33) |
| Black                                | 355625      | 10218   | 1.01  | (0.99 - 1.03) | 0.92             | (0.90 - 0.94) | 0.91             | (0.90 - 0.93) | 0.86                                     | (0.85 - 0.88) | 0.85                | (0.84 - 0.87) |
| Mixed                                | 179557      | 5583    | 1.15  | (1.12 - 1.18) | 0.99             | (0.96 - 1.01) | 0.98             | (0.96 - 1.01) | 0.98                                     | (0.96 - 1.01) | 0.98                | (0.95 - 1.01) |
| Other                                | 334962      | 6995    | 0.79  | (0.77 - 0.80) | 0.68             | (0.67 - 0.70) | 0.68             | (0.67 - 0.70) | 0.72                                     | (0.70 - 0.73) | 0.72                | (0.70 - 0.73) |
| Unknown                              | 4381803     | 125136  | 1.06  | (1.05 - 1.07) | 1.01             | (1.00 - 1.01) | 1.01             | (1.00 - 1.02) | 1.05                                     | (1.05 - 1.06) | 1.04                | (1.03 - 1.05) |
| <b>Hospital admission (n=18,855)</b> |             |         |       |               |                  |               |                  |               |                                          |               |                     |               |
| White                                | 11323083    | 12120   | 1     |               | 1                |               | 1                |               | 1                                        |               | 1                   |               |
| South Asian                          | 1061336     | 2100    | 1.71  | (1.62 - 1.79) | 2.73             | (2.60 - 2.87) | 2.35             | (2.24 - 2.47) | 2.05                                     | (1.95 - 2.16) | 1.89                | (1.79 - 2.00) |
| Black                                | 355625      | 362     | 1     | (0.90 - 1.11) | 1.55             | (1.39 - 1.73) | 1.28             | (1.15 - 1.43) | 1.27                                     | (1.14 - 1.41) | 1.23                | (1.11 - 1.37) |
| Mixed                                | 179557      | 132     | 0.75  | (0.63 - 0.89) | 1.47             | (1.23 - 1.74) | 1.33             | (1.12 - 1.58) | 1.36                                     | (1.14 - 1.62) | 1.33                | (1.12 - 1.58) |
| Other                                | 334962      | 222     | 0.69  | (0.60 - 0.79) | 1.28             | (1.12 - 1.46) | 1.18             | (1.03 - 1.35) | 1.37                                     | (1.20 - 1.57) | 1.32                | (1.16 - 1.51) |
| Unknown                              | 4381803     | 3919    | 0.87  | (0.84 - 0.91) | 0.96             | (0.93 - 1.00) | 0.97             | (0.93 - 1.00) | 1.07                                     | (1.04 - 1.12) | 1.07                | (1.03 - 1.11) |
| <b>ICU admission (n=3,351)</b>       |             |         |       |               |                  |               |                  |               |                                          |               |                     |               |
| White                                | 11323083    | 1969    | 1     |               | 1                |               | 1                |               | 1                                        |               | 1                   |               |
| South Asian                          | 1061336     | 534     | 2.85  | (2.57 - 3.16) | 4.12             | (3.71 - 4.59) | 3.62             | (3.25 - 4.02) | 2.93                                     | (2.62 - 3.27) | 2.68                | (2.39 - 3.01) |
| Black                                | 355625      | 106     | 1.65  | (1.35 - 2.02) | 2.22             | (1.82 - 2.71) | 1.84             | (1.50 - 2.25) | 1.73                                     | (1.41 - 2.12) | 1.67                | (1.37 - 2.05) |
| Mixed                                | 179557      | 44      | 1.43  | (1.06 - 1.93) | 2.45             | (1.81 - 3.31) | 2.21             | (1.63 - 2.98) | 2.3                                      | (1.70 - 3.10) | 2.23                | (1.65 - 3.02) |
| Other                                | 334962      | 60      | 1.05  | (0.81 - 1.37) | 1.74             | (1.34 - 2.26) | 1.6              | (1.23 - 2.07) | 1.97                                     | (1.52 - 2.56) | 1.9                 | (1.46 - 2.46) |
| Unknown                              | 4381803     | 638     | 0.84  | (0.77 - 0.92) | 0.95             | (0.86 - 1.03) | 0.95             | (0.87 - 1.04) | 1.02                                     | (0.93 - 1.11) | 1.01                | (0.92 - 1.11) |

| <b>COVID-19 death (n=7,366)</b>      |          |       |      |               |      |               |      |               |      |               |      |               |
|--------------------------------------|----------|-------|------|---------------|------|---------------|------|---------------|------|---------------|------|---------------|
| White                                | 11323083 | 4874  | 1    |               | 1    |               | 1    |               | 1    |               | 1    |               |
| South Asian                          | 1061336  | 532   | 1.17 | (1.07 - 1.28) | 2.8  | (2.55 - 3.08) | 2.35 | (2.14 - 2.59) | 2.19 | (1.98 - 2.41) | 1.87 | (1.68 - 2.07) |
| Black                                | 355625   | 75    | 0.52 | (0.42 - 0.66) | 1.17 | (0.93 - 1.47) | 0.94 | (0.75 - 1.19) | 0.94 | (0.74 - 1.18) | 0.92 | (0.73 - 1.16) |
| Mixed                                | 179557   | 26    | 0.38 | (0.26 - 0.55) | 1.41 | (0.96 - 2.07) | 1.25 | (0.85 - 1.84) | 1.28 | (0.87 - 1.88) | 1.24 | (0.85 - 1.83) |
| Other                                | 334962   | 35    | 0.28 | (0.20 - 0.40) | 0.93 | (0.66 - 1.29) | 0.84 | (0.60 - 1.18) | 0.96 | (0.69 - 1.34) | 0.92 | (0.66 - 1.29) |
| Unknown                              | 4381803  | 1824  | 1    | (0.94 - 1.05) | 1.06 | (1.00 - 1.12) | 1.07 | (1.01 - 1.13) | 1.16 | (1.10 - 1.23) | 1.17 | (1.11 - 1.24) |
| <b>Non COVID-19 death (n=41,801)</b> |          |       |      |               |      |               |      |               |      |               |      |               |
| White                                | 11323083 | 28229 | 1    |               | 1    |               | 1    |               | 1    |               | 1    |               |
| South Asian                          | 1061336  | 973   | 0.41 | (0.38 - 0.43) | 0.86 | (0.81 - 0.92) | 0.78 | (0.73 - 0.84) | 0.92 | (0.86 - 0.99) | 0.88 | (0.82 - 0.94) |
| Black                                | 355625   | 349   | 0.44 | (0.40 - 0.49) | 0.9  | (0.81 - 1.00) | 0.79 | (0.71 - 0.88) | 0.86 | (0.77 - 0.96) | 0.85 | (0.77 - 0.95) |
| Mixed                                | 179557   | 134   | 0.33 | (0.28 - 0.39) | 1.03 | (0.87 - 1.22) | 0.96 | (0.81 - 1.14) | 1.04 | (0.88 - 1.23) | 1.03 | (0.87 - 1.23) |
| Other                                | 334962   | 179   | 0.24 | (0.21 - 0.28) | 0.69 | (0.59 - 0.79) | 0.65 | (0.56 - 0.76) | 0.73 | (0.63 - 0.85) | 0.72 | (0.62 - 0.84) |
| Unknown                              | 4381803  | 11937 | 1.09 | (1.07 - 1.11) | 1.1  | (1.08 - 1.13) | 1.11 | (1.08 - 1.13) | 1.19 | (1.16 - 1.21) | 1.19 | (1.17 - 1.22) |

\*Any counts <5 are set to 5 per data disclosure agreements

Table S6. Association between ethnicity in 16 categories and COVID-19 outcomes in wave 2 (serial adjustment)

|                                  | Denominator | Event   | Crude |               | Age-Sex Adjusted |               | Plus Deprivation |               | Plus Co-morbidities and Clinical Factors |               | Plus Household size |               |
|----------------------------------|-------------|---------|-------|---------------|------------------|---------------|------------------|---------------|------------------------------------------|---------------|---------------------|---------------|
|                                  |             |         | HR    | 95% CI        | HR               | 95% CI        | HR               | 95% CI        | HR                                       | 95% CI        | HR                  | 95% CI        |
| <b>Tested (n=1,736,366)</b>      |             |         |       |               |                  |               |                  |               |                                          |               |                     |               |
| British                          | 9845315     | 1567742 | 1     |               | 1                |               | 1                |               | 1                                        |               | 1                   |               |
| Irish                            | 81185       | 11763   | 0.9   | (0.88 - 0.92) | 0.92             | (0.90 - 0.93) | 0.92             | (0.90 - 0.94) | 0.94                                     | (0.92 - 0.95) | 0.94                | (0.92 - 0.96) |
| Other White                      | 1396583     | 153767  | 0.68  | (0.68 - 0.68) | 0.61             | (0.61 - 0.61) | 0.61             | (0.61 - 0.62) | 0.67                                     | (0.66 - 0.67) | 0.67                | (0.66 - 0.67) |
| White + Caribbean                | 41228       | 6868    | 1.03  | (1.00 - 1.05) | 0.9              | (0.87 - 0.92) | 0.9              | (0.88 - 0.92) | 0.9                                      | (0.88 - 0.92) | 0.9                 | (0.88 - 0.92) |
| White + African                  | 34991       | 5134    | 0.89  | (0.87 - 0.92) | 0.79             | (0.77 - 0.81) | 0.8              | (0.78 - 0.82) | 0.83                                     | (0.81 - 0.86) | 0.83                | (0.81 - 0.86) |
| White + Asian                    | 36257       | 5548    | 0.97  | (0.94 - 0.99) | 0.84             | (0.81 - 0.86) | 0.84             | (0.82 - 0.86) | 0.87                                     | (0.85 - 0.89) | 0.87                | (0.85 - 0.90) |
| Other mixed                      | 67081       | 9129    | 0.85  | (0.83 - 0.87) | 0.74             | (0.72 - 0.75) | 0.74             | (0.73 - 0.76) | 0.78                                     | (0.76 - 0.79) | 0.78                | (0.76 - 0.80) |
| Indian                           | 447812      | 66056   | 0.92  | (0.91 - 0.93) | 0.86             | (0.86 - 0.87) | 0.87             | (0.86 - 0.87) | 0.88                                     | (0.87 - 0.89) | 0.88                | (0.87 - 0.88) |
| Pakistani                        | 309214      | 58882   | 1.16  | (1.15 - 1.17) | 1.03             | (1.02 - 1.04) | 1.04             | (1.03 - 1.05) | 1.02                                     | (1.01 - 1.03) | 1.02                | (1.02 - 1.03) |
| Bangladeshi                      | 73154       | 11396   | 0.93  | (0.91 - 0.95) | 0.82             | (0.80 - 0.83) | 0.82             | (0.81 - 0.84) | 0.81                                     | (0.79 - 0.82) | 0.81                | (0.79 - 0.82) |
| Other Asian                      | 231156      | 30522   | 0.82  | (0.81 - 0.83) | 0.74             | (0.73 - 0.75) | 0.74             | (0.74 - 0.75) | 0.77                                     | (0.76 - 0.78) | 0.77                | (0.76 - 0.77) |
| Caribbean                        | 84219       | 10749   | 0.76  | (0.75 - 0.78) | 0.76             | (0.74 - 0.77) | 0.76             | (0.75 - 0.78) | 0.76                                     | (0.75 - 0.78) | 0.76                | (0.75 - 0.78) |
| African                          | 199012      | 27417   | 0.83  | (0.82 - 0.84) | 0.74             | (0.73 - 0.75) | 0.75             | (0.74 - 0.76) | 0.78                                     | (0.77 - 0.79) | 0.78                | (0.77 - 0.79) |
| Other Black                      | 72394       | 9902    | 0.82  | (0.80 - 0.84) | 0.74             | (0.73 - 0.76) | 0.75             | (0.73 - 0.76) | 0.76                                     | (0.75 - 0.78) | 0.77                | (0.75 - 0.78) |
| Chinese                          | 105658      | 6444    | 0.37  | (0.36 - 0.38) | 0.32             | (0.31 - 0.32) | 0.32             | (0.31 - 0.32) | 0.37                                     | (0.37 - 0.38) | 0.38                | (0.38 - 0.39) |
| Other                            | 229304      | 26460   | 0.72  | (0.71 - 0.72) | 0.64             | (0.63 - 0.65) | 0.64             | (0.64 - 0.65) | 0.68                                     | (0.68 - 0.69) | 0.69                | (0.68 - 0.70) |
| Unknown                          | 4381803     | 639977  | 0.91  | (0.90 - 0.91) | 0.87             | (0.87 - 0.87) | 0.87             | (0.87 - 0.87) | 0.95                                     | (0.95 - 0.95) | 0.94                | (0.94 - 0.95) |
| <b>Positive test (n=506,773)</b> |             |         |       |               |                  |               |                  |               |                                          |               |                     |               |
| British                          | 9845315     | 275080  | 1     |               | 1                |               | 1                |               | 1                                        |               | 1                   |               |
| Irish                            | 81185       | 1772    | 0.8   | (0.76 - 0.83) | 0.83             | (0.79 - 0.87) | 0.83             | (0.79 - 0.87) | 0.85                                     | (0.81 - 0.89) | 0.85                | (0.81 - 0.89) |
| Other White                      | 1396583     | 31131   | 0.83  | (0.82 - 0.84) | 0.73             | (0.72 - 0.74) | 0.72             | (0.72 - 0.73) | 0.79                                     | (0.78 - 0.79) | 0.78                | (0.77 - 0.79) |
| White + Caribbean                | 41228       | 1414    | 1.17  | (1.11 - 1.24) | 0.98             | (0.93 - 1.03) | 0.98             | (0.93 - 1.03) | 0.98                                     | (0.93 - 1.04) | 0.99                | (0.94 - 1.04) |
| White + African                  | 34991       | 1110    | 1.12  | (1.06 - 1.19) | 0.96             | (0.90 - 1.01) | 0.95             | (0.90 - 1.01) | 0.93                                     | (0.88 - 0.99) | 0.92                | (0.87 - 0.98) |
| White + Asian                    | 36257       | 1213    | 1.22  | (1.15 - 1.29) | 1.01             | (0.96 - 1.07) | 1.01             | (0.96 - 1.07) | 1.02                                     | (0.97 - 1.08) | 1.02                | (0.96 - 1.08) |
| Other mixed                      | 67081       | 1846    | 1.02  | (0.97 - 1.07) | 0.85             | (0.81 - 0.89) | 0.85             | (0.81 - 0.88) | 0.87                                     | (0.83 - 0.91) | 0.87                | (0.83 - 0.91) |
| Indian                           | 447812      | 18670   | 1.45  | (1.43 - 1.47) | 1.32             | (1.30 - 1.34) | 1.32             | (1.30 - 1.34) | 1.23                                     | (1.21 - 1.25) | 1.18                | (1.16 - 1.20) |
| Pakistani                        | 309214      | 19779   | 1.99  | (1.96 - 2.02) | 1.71             | (1.69 - 1.74) | 1.7              | (1.68 - 1.73) | 1.54                                     | (1.52 - 1.56) | 1.46                | (1.44 - 1.48) |
| Bangladeshi                      | 73154       | 3935    | 1.84  | (1.78 - 1.89) | 1.55             | (1.50 - 1.60) | 1.54             | (1.49 - 1.59) | 1.41                                     | (1.36 - 1.45) | 1.34                | (1.29 - 1.38) |

|             |         |        |      |               |      |               |      |               |      |               |      |               |
|-------------|---------|--------|------|---------------|------|---------------|------|---------------|------|---------------|------|---------------|
| Other Asian | 231156  | 8474   | 1.33 | (1.30 - 1.36) | 1.16 | (1.14 - 1.19) | 1.16 | (1.13 - 1.18) | 1.11 | (1.08 - 1.13) | 1.07 | (1.05 - 1.10) |
| Caribbean   | 84219   | 2146   | 0.85 | (0.82 - 0.89) | 0.84 | (0.80 - 0.88) | 0.83 | (0.80 - 0.87) | 0.81 | (0.78 - 0.85) | 0.81 | (0.78 - 0.85) |
| African     | 199012  | 5920   | 1.01 | (0.99 - 1.04) | 0.87 | (0.85 - 0.90) | 0.87 | (0.84 - 0.89) | 0.83 | (0.81 - 0.85) | 0.81 | (0.79 - 0.83) |
| Other Black | 72394   | 2152   | 1.01 | (0.97 - 1.06) | 0.88 | (0.85 - 0.92) | 0.88 | (0.84 - 0.92) | 0.85 | (0.81 - 0.89) | 0.84 | (0.80 - 0.88) |
| Chinese     | 105658  | 781    | 0.27 | (0.25 - 0.29) | 0.22 | (0.21 - 0.24) | 0.22 | (0.21 - 0.24) | 0.25 | (0.23 - 0.27) | 0.26 | (0.24 - 0.27) |
| Other       | 229304  | 6214   | 0.98 | (0.96 - 1.01) | 0.85 | (0.83 - 0.87) | 0.84 | (0.82 - 0.86) | 0.87 | (0.85 - 0.90) | 0.86 | (0.84 - 0.88) |
| Unknown     | 4381803 | 125136 | 1.04 | (1.03 - 1.04) | 0.97 | (0.96 - 0.98) | 0.97 | (0.96 - 0.98) | 1.02 | (1.02 - 1.03) | 1.01 | (1.00 - 1.02) |

#### Hospital admission (n=18,855)

|                   |         |       |      |               |      |               |      |               |      |               |      |               |
|-------------------|---------|-------|------|---------------|------|---------------|------|---------------|------|---------------|------|---------------|
| British           | 9845315 | 11209 | 1    |               | 1    |               | 1    |               | 1    |               | 1    |               |
| Irish             | 81185   | 92    | 1.19 | (0.97 - 1.47) | 1.02 | (0.83 - 1.25) | 0.96 | (0.78 - 1.17) | 0.94 | (0.77 - 1.16) | 0.94 | (0.77 - 1.16) |
| Other White       | 1396583 | 819   | 0.61 | (0.57 - 0.65) | 0.97 | (0.91 - 1.05) | 0.91 | (0.84 - 0.97) | 1.03 | (0.95 - 1.10) | 1.01 | (0.94 - 1.09) |
| White + Caribbean | 41228   | 39    | 0.81 | (0.59 - 1.12) | 1.5  | (1.09 - 2.05) | 1.3  | (0.95 - 1.78) | 1.27 | (0.93 - 1.75) | 1.27 | (0.92 - 1.74) |
| White + African   | 34991   | 21    | 0.59 | (0.39 - 0.91) | 1.23 | (0.80 - 1.89) | 1.07 | (0.70 - 1.64) | 1.14 | (0.74 - 1.75) | 1.1  | (0.72 - 1.69) |
| White + Asian     | 36257   | 34    | 0.9  | (0.64 - 1.26) | 1.93 | (1.38 - 2.71) | 1.84 | (1.31 - 2.57) | 1.94 | (1.38 - 2.71) | 1.88 | (1.34 - 2.64) |
| Other mixed       | 67081   | 38    | 0.6  | (0.43 - 0.82) | 1.28 | (0.93 - 1.76) | 1.17 | (0.85 - 1.61) | 1.26 | (0.91 - 1.73) | 1.23 | (0.89 - 1.69) |
| Indian            | 447812  | 665   | 1.31 | (1.21 - 1.42) | 1.94 | (1.79 - 2.11) | 1.76 | (1.62 - 1.91) | 1.66 | (1.52 - 1.80) | 1.57 | (1.44 - 1.71) |
| Pakistani         | 309214  | 992   | 2.05 | (1.92 - 2.19) | 3.65 | (3.41 - 3.91) | 2.91 | (2.72 - 3.12) | 2.36 | (2.20 - 2.53) | 2.13 | (1.98 - 2.30) |
| Bangladeshi       | 73154   | 151   | 1.83 | (1.56 - 2.15) | 3.72 | (3.16 - 4.37) | 2.96 | (2.52 - 3.49) | 2.55 | (2.17 - 3.00) | 2.31 | (1.96 - 2.72) |
| Other Asian       | 231156  | 292   | 1.29 | (1.14 - 1.45) | 2.37 | (2.11 - 2.67) | 2.12 | (1.88 - 2.38) | 2.06 | (1.83 - 2.32) | 1.94 | (1.72 - 2.19) |
| Caribbean         | 84219   | 117   | 1.2  | (1.00 - 1.44) | 1.22 | (1.02 - 1.47) | 1.01 | (0.84 - 1.22) | 0.98 | (0.82 - 1.18) | 0.98 | (0.81 - 1.17) |
| African           | 199012  | 177   | 0.85 | (0.73 - 0.98) | 1.79 | (1.54 - 2.08) | 1.46 | (1.26 - 1.70) | 1.51 | (1.30 - 1.76) | 1.44 | (1.24 - 1.68) |
| Other Black       | 72394   | 68    | 0.89 | (0.70 - 1.13) | 1.63 | (1.28 - 2.07) | 1.37 | (1.08 - 1.74) | 1.38 | (1.09 - 1.75) | 1.34 | (1.05 - 1.70) |
| Chinese           | 105658  | 20    | 0.19 | (0.12 - 0.29) | 0.39 | (0.25 - 0.61) | 0.39 | (0.25 - 0.60) | 0.54 | (0.35 - 0.84) | 0.53 | (0.34 - 0.82) |
| Other             | 229304  | 202   | 0.86 | (0.75 - 0.99) | 1.62 | (1.41 - 1.87) | 1.44 | (1.25 - 1.66) | 1.61 | (1.40 - 1.86) | 1.56 | (1.35 - 1.79) |
| Unknown           | 4381803 | 3919  | 0.84 | (0.81 - 0.87) | 0.96 | (0.93 - 1.00) | 0.96 | (0.93 - 1.00) | 1.08 | (1.04 - 1.12) | 1.07 | (1.03 - 1.11) |

#### ICU admission (n=3,351)

|                   |         |      |      |               |      |               |      |               |      |               |      |               |
|-------------------|---------|------|------|---------------|------|---------------|------|---------------|------|---------------|------|---------------|
| British           | 9845315 | 1767 | 1    |               | 1    |               | 1    |               | 1    |               | 1    |               |
| Irish             | 81185   | 11   | 0.78 | (0.43 - 1.41) | 0.76 | (0.42 - 1.37) | 0.72 | (0.40 - 1.30) | 0.76 | (0.42 - 1.37) | 0.75 | (0.42 - 1.36) |
| Other White       | 1396583 | 191  | 0.81 | (0.69 - 0.94) | 1.27 | (1.09 - 1.49) | 1.18 | (1.01 - 1.38) | 1.39 | (1.19 - 1.62) | 1.36 | (1.17 - 1.59) |
| White + Caribbean | 41228   | 10   | 1.31 | (0.70 - 2.45) | 2.28 | (1.22 - 4.25) | 1.99 | (1.07 - 3.71) | 1.96 | (1.05 - 3.65) | 1.94 | (1.04 - 3.62) |
| White + African   | 34991   | 11   | 1.76 | (0.97 - 3.19) | 2.95 | (1.63 - 5.35) | 2.53 | (1.40 - 4.58) | 2.55 | (1.40 - 4.62) | 2.44 | (1.35 - 4.43) |
| White + Asian     | 36257   | 13   | 2.05 | (1.19 - 3.53) | 3.87 | (2.24 - 6.69) | 3.69 | (2.13 - 6.37) | 4.24 | (2.45 - 7.33) | 4.11 | (2.38 - 7.10) |

|             |         |     |      |               |      |               |      |               |      |               |      |               |
|-------------|---------|-----|------|---------------|------|---------------|------|---------------|------|---------------|------|---------------|
| Other mixed | 67081   | 10  | 0.86 | (0.46 - 1.60) | 1.65 | (0.88 - 3.08) | 1.5  | (0.81 - 2.81) | 1.68 | (0.90 - 3.13) | 1.63 | (0.87 - 3.04) |
| Indian      | 447812  | 169 | 2.14 | (1.81 - 2.52) | 2.91 | (2.46 - 3.45) | 2.69 | (2.27 - 3.19) | 2.32 | (1.95 - 2.76) | 2.16 | (1.82 - 2.58) |
| Pakistani   | 309214  | 211 | 3.47 | (2.99 - 4.03) | 5.76 | (4.95 - 6.70) | 4.63 | (3.97 - 5.41) | 3.44 | (2.94 - 4.02) | 3.1  | (2.64 - 3.65) |
| Bangladeshi | 73154   | 47  | 3.43 | (2.56 - 4.60) | 6.4  | (4.77 - 8.59) | 5.1  | (3.80 - 6.86) | 4.41 | (3.28 - 5.94) | 4    | (2.96 - 5.40) |
| Other Asian | 231156  | 107 | 2.63 | (2.15 - 3.21) | 4.22 | (3.45 - 5.17) | 3.79 | (3.09 - 4.64) | 3.4  | (2.76 - 4.17) | 3.19 | (2.59 - 3.92) |
| Caribbean   | 84219   | 33  | 2.02 | (1.43 - 2.87) | 2.14 | (1.51 - 3.04) | 1.79 | (1.26 - 2.54) | 1.7  | (1.19 - 2.41) | 1.68 | (1.18 - 2.39) |
| African     | 199012  | 51  | 1.39 | (1.05 - 1.84) | 2.3  | (1.73 - 3.05) | 1.87 | (1.41 - 2.48) | 1.81 | (1.36 - 2.41) | 1.72 | (1.29 - 2.29) |
| Other Black | 72394   | 22  | 1.61 | (1.06 - 2.46) | 2.38 | (1.56 - 3.63) | 2    | (1.31 - 3.06) | 1.96 | (1.28 - 2.99) | 1.9  | (1.24 - 2.90) |
| Chinese     | 105658  | 8   | 0.43 | (0.22 - 0.87) | 0.86 | (0.43 - 1.72) | 0.85 | (0.42 - 1.70) | 1.5  | (0.75 - 3.01) | 1.45 | (0.72 - 2.92) |
| Other       | 229304  | 52  | 1.27 | (0.96 - 1.68) | 2.12 | (1.60 - 2.81) | 1.89 | (1.42 - 2.50) | 2.17 | (1.64 - 2.87) | 2.08 | (1.57 - 2.76) |
| Unknown     | 4381803 | 638 | 0.82 | (0.75 - 0.90) | 0.96 | (0.88 - 1.06) | 0.96 | (0.88 - 1.05) | 1.04 | (0.95 - 1.15) | 1.04 | (0.94 - 1.14) |

**COVID-19 death (n=7,366)**

|                   |         |      |      |               |      |               |      |               |      |               |      |               |
|-------------------|---------|------|------|---------------|------|---------------|------|---------------|------|---------------|------|---------------|
| British           | 9845315 | 4599 | 1    |               | 1    |               | 1    |               | 1    |               | 1    |               |
| Irish             | 81185   | 32   | 1.01 | (0.71 - 1.43) | 0.77 | (0.54 - 1.09) | 0.71 | (0.50 - 1.01) | 0.69 | (0.49 - 0.98) | 0.69 | (0.49 - 0.98) |
| Other White       | 1396583 | 243  | 0.43 | (0.38 - 0.49) | 0.97 | (0.85 - 1.10) | 0.92 | (0.81 - 1.05) | 0.97 | (0.85 - 1.11) | 0.96 | (0.84 - 1.09) |
| White + Caribbean | 41228   | 7    | 0.36 | (0.17 - 0.76) | 1.03 | (0.49 - 2.17) | 0.87 | (0.41 - 1.82) | 0.8  | (0.38 - 1.69) | 0.8  | (0.38 - 1.69) |
| White + African   | 34991   | 6    | 0.41 | (0.18 - 0.91) | 1.99 | (0.89 - 4.44) | 1.73 | (0.78 - 3.86) | 2.04 | (0.91 - 4.54) | 1.93 | (0.86 - 4.30) |
| White + Asian     | 36257   | 5    | 0.33 | (0.14 - 0.80) | 1.53 | (0.63 - 3.67) | 1.46 | (0.61 - 3.52) | 1.59 | (0.66 - 3.83) | 1.51 | (0.63 - 3.64) |
| Other mixed       | 67081   | 8    | 0.31 | (0.16 - 0.62) | 1.41 | (0.70 - 2.82) | 1.28 | (0.64 - 2.57) | 1.38 | (0.69 - 2.77) | 1.35 | (0.67 - 2.70) |
| Indian            | 447812  | 205  | 1.08 | (0.93 - 1.24) | 2.19 | (1.89 - 2.54) | 1.96 | (1.69 - 2.27) | 2.01 | (1.73 - 2.33) | 1.84 | (1.58 - 2.15) |
| Pakistani         | 309214  | 240  | 1.35 | (1.18 - 1.54) | 3.77 | (3.30 - 4.31) | 2.88 | (2.51 - 3.29) | 2.42 | (2.11 - 2.78) | 1.94 | (1.67 - 2.24) |
| Bangladeshi       | 73154   | 39   | 1.16 | (0.85 - 1.60) | 4.57 | (3.33 - 6.28) | 3.48 | (2.53 - 4.78) | 2.84 | (2.07 - 3.91) | 2.26 | (1.64 - 3.13) |
| Other Asian       | 231156  | 48   | 0.54 | (0.40 - 0.72) | 1.76 | (1.32 - 2.34) | 1.55 | (1.16 - 2.07) | 1.58 | (1.18 - 2.11) | 1.41 | (1.05 - 1.88) |
| Caribbean         | 84219   | 44   | 1.12 | (0.83 - 1.51) | 1.1  | (0.82 - 1.49) | 0.89 | (0.66 - 1.20) | 0.85 | (0.63 - 1.14) | 0.85 | (0.63 - 1.15) |
| African           | 199012  | 19   | 0.22 | (0.14 - 0.35) | 1.16 | (0.74 - 1.83) | 0.93 | (0.59 - 1.47) | 1.03 | (0.65 - 1.62) | 0.95 | (0.61 - 1.50) |
| Other Black       | 72394   | 12   | 0.38 | (0.22 - 0.67) | 1.31 | (0.74 - 2.31) | 1.08 | (0.61 - 1.91) | 1.12 | (0.64 - 1.98) | 1.08 | (0.61 - 1.90) |
| Chinese           | 105658  | 6    | 0.14 | (0.06 - 0.32) | 0.54 | (0.24 - 1.20) | 0.52 | (0.23 - 1.16) | 0.72 | (0.32 - 1.59) | 0.7  | (0.31 - 1.55) |
| Other             | 229304  | 29   | 0.31 | (0.22 - 0.45) | 1.06 | (0.73 - 1.53) | 0.94 | (0.65 - 1.36) | 1.02 | (0.70 - 1.47) | 0.97 | (0.67 - 1.40) |
| Unknown           | 4381803 | 1824 | 0.94 | (0.89 - 0.99) | 1.05 | (1.00 - 1.11) | 1.06 | (1.00 - 1.12) | 1.16 | (1.10 - 1.23) | 1.16 | (1.10 - 1.23) |

**Non COVID-19 death (n=41,801)**

|         |         |       |      |               |      |               |      |               |      |               |      |               |
|---------|---------|-------|------|---------------|------|---------------|------|---------------|------|---------------|------|---------------|
| British | 9845315 | 26499 | 1    |               | 1    |               | 1    |               | 1    |               | 1    |               |
| Irish   | 81185   | 289   | 1.45 | (1.29 - 1.63) | 1.18 | (1.05 - 1.33) | 1.13 | (1.00 - 1.26) | 1.05 | (0.94 - 1.18) | 1.05 | (0.93 - 1.18) |

|                   |         |       |      |               |      |               |      |               |      |               |      |               |
|-------------------|---------|-------|------|---------------|------|---------------|------|---------------|------|---------------|------|---------------|
| Other White       | 1396583 | 1441  | 0.41 | (0.39 - 0.44) | 0.9  | (0.86 - 0.95) | 0.87 | (0.83 - 0.92) | 0.91 | (0.86 - 0.96) | 0.91 | (0.86 - 0.96) |
| White + Caribbean | 41228   | 47    | 0.45 | (0.34 - 0.60) | 1.15 | (0.86 - 1.53) | 1.04 | (0.78 - 1.38) | 1.07 | (0.80 - 1.42) | 1.07 | (0.80 - 1.42) |
| White + African   | 34991   | 21    | 0.24 | (0.16 - 0.37) | 0.93 | (0.61 - 1.43) | 0.85 | (0.56 - 1.31) | 1.05 | (0.68 - 1.60) | 1.03 | (0.67 - 1.57) |
| White + Asian     | 36257   | 23    | 0.25 | (0.17 - 0.38) | 0.95 | (0.63 - 1.43) | 0.93 | (0.61 - 1.39) | 0.98 | (0.65 - 1.47) | 0.97 | (0.64 - 1.46) |
| Other mixed       | 67081   | 43    | 0.26 | (0.20 - 0.36) | 0.98 | (0.72 - 1.32) | 0.93 | (0.69 - 1.25) | 1.02 | (0.75 - 1.37) | 1.01 | (0.75 - 1.36) |
| Indian            | 447812  | 488   | 0.44 | (0.41 - 0.49) | 0.84 | (0.77 - 0.92) | 0.79 | (0.72 - 0.86) | 0.97 | (0.88 - 1.06) | 0.94 | (0.86 - 1.03) |
| Pakistani         | 309214  | 314   | 0.4  | (0.35 - 0.44) | 1.03 | (0.92 - 1.15) | 0.87 | (0.78 - 0.98) | 0.96 | (0.86 - 1.08) | 0.88 | (0.79 - 0.99) |
| Bangladeshi       | 73154   | 53    | 0.29 | (0.22 - 0.38) | 1    | (0.76 - 1.31) | 0.85 | (0.65 - 1.11) | 0.85 | (0.65 - 1.12) | 0.79 | (0.60 - 1.04) |
| Other Asian       | 231156  | 118   | 0.22 | (0.18 - 0.26) | 0.59 | (0.49 - 0.71) | 0.55 | (0.46 - 0.67) | 0.68 | (0.57 - 0.82) | 0.66 | (0.55 - 0.79) |
| Caribbean         | 84219   | 185   | 0.9  | (0.78 - 1.04) | 0.89 | (0.77 - 1.03) | 0.78 | (0.67 - 0.90) | 0.8  | (0.69 - 0.92) | 0.8  | (0.69 - 0.93) |
| African           | 199012  | 103   | 0.21 | (0.18 - 0.26) | 0.83 | (0.68 - 1.01) | 0.73 | (0.60 - 0.89) | 0.9  | (0.74 - 1.09) | 0.88 | (0.72 - 1.07) |
| Other Black       | 72394   | 61    | 0.34 | (0.27 - 0.44) | 1.02 | (0.79 - 1.31) | 0.91 | (0.71 - 1.17) | 0.96 | (0.75 - 1.24) | 0.95 | (0.74 - 1.22) |
| Chinese           | 105658  | 46    | 0.18 | (0.13 - 0.23) | 0.62 | (0.46 - 0.83) | 0.61 | (0.45 - 0.81) | 0.74 | (0.56 - 0.99) | 0.74 | (0.55 - 0.99) |
| Other             | 229304  | 133   | 0.24 | (0.20 - 0.28) | 0.7  | (0.59 - 0.83) | 0.66 | (0.55 - 0.78) | 0.72 | (0.60 - 0.85) | 0.71 | (0.60 - 0.84) |
| Unknown           | 4381803 | 11937 | 1.02 | (1.00 - 1.04) | 1.1  | (1.08 - 1.12) | 1.1  | (1.08 - 1.12) | 1.18 | (1.16 - 1.21) | 1.19 | (1.16 - 1.21) |

\*Any counts <5 are set to 5 per data disclosure agreements

Table S7. Testing the proportional Hazards assumptions for each outcome (wave 1)

| Testing the PH assumption for each outcome by ethnic group | Global p.value |                  |                |
|------------------------------------------------------------|----------------|------------------|----------------|
|                                                            | Crude          | Age/Sex Adjusted | Fully Adjusted |
|                                                            | p-value        | p-value          | p-value        |
| tested                                                     | 0.905          | 0.699            | 0.59           |
| positivetest                                               | 0.225          | 0.25             | 0.293          |
| icu                                                        | 0.959          | 0.828            | 0.854          |
| hes                                                        | 0.167          | 0.063            | 0.102          |
| onscoviddeath                                              | 0.885          | 1                | 1              |
| ons_noncoviddeath                                          | 0.527          | 0.173            | 0.222          |
| onsdeath                                                   | 0.529          | 0.201            | 0.257          |

Figure S1. Odds of testing positive for SARS-CoV-2 amongst those ever receiving a test

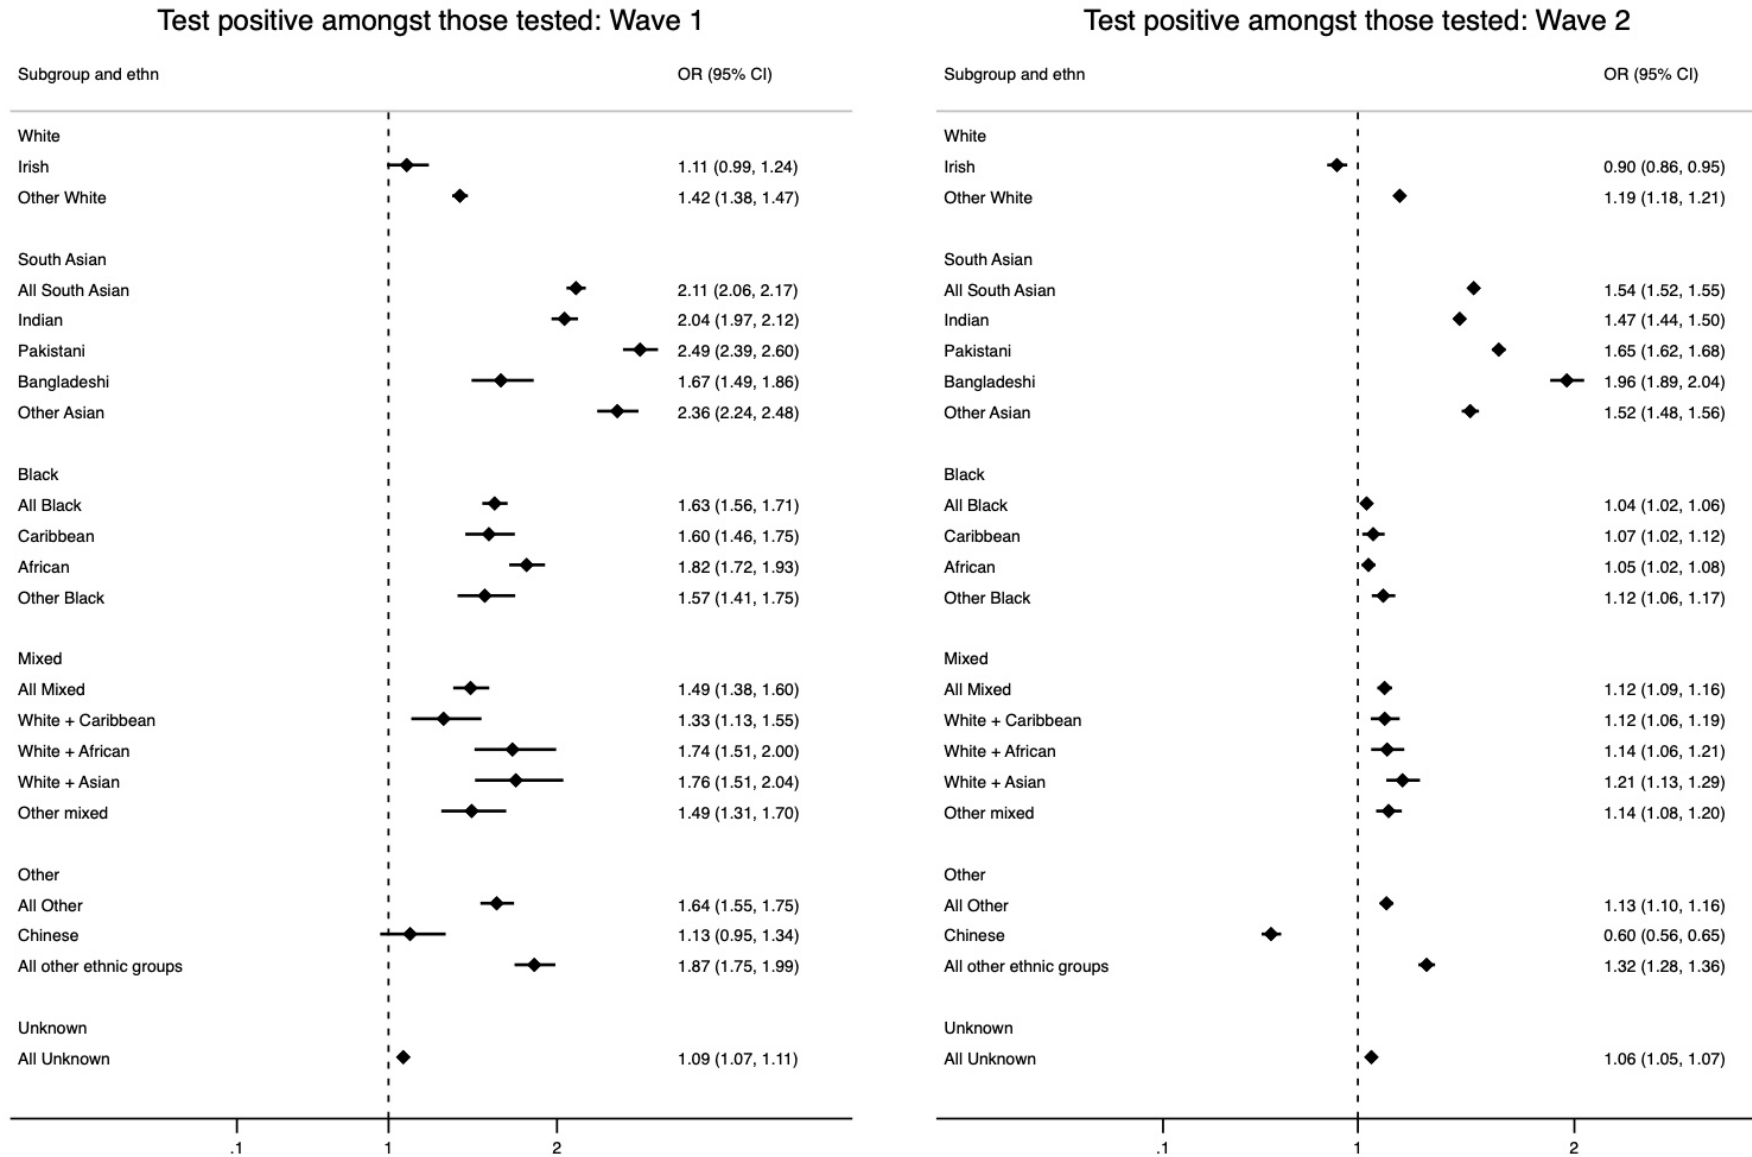

\*All White is the reference category for comparison of ethnicity in 5 categories. British is the reference category for comparison of ethnicity in 16 categories. Models adjust for age, sex, deprivation quintile, all pre-specified clinical co-morbidities, categories of BMI, HbA1c, and systolic and diastolic blood pressure, number of primary care consultations in the 12 months prior, and STP region.



Figure S2. Association between ethnicity in 5 categories and COVID-19 outcomes in the care-home population in wave 1 and wave 2

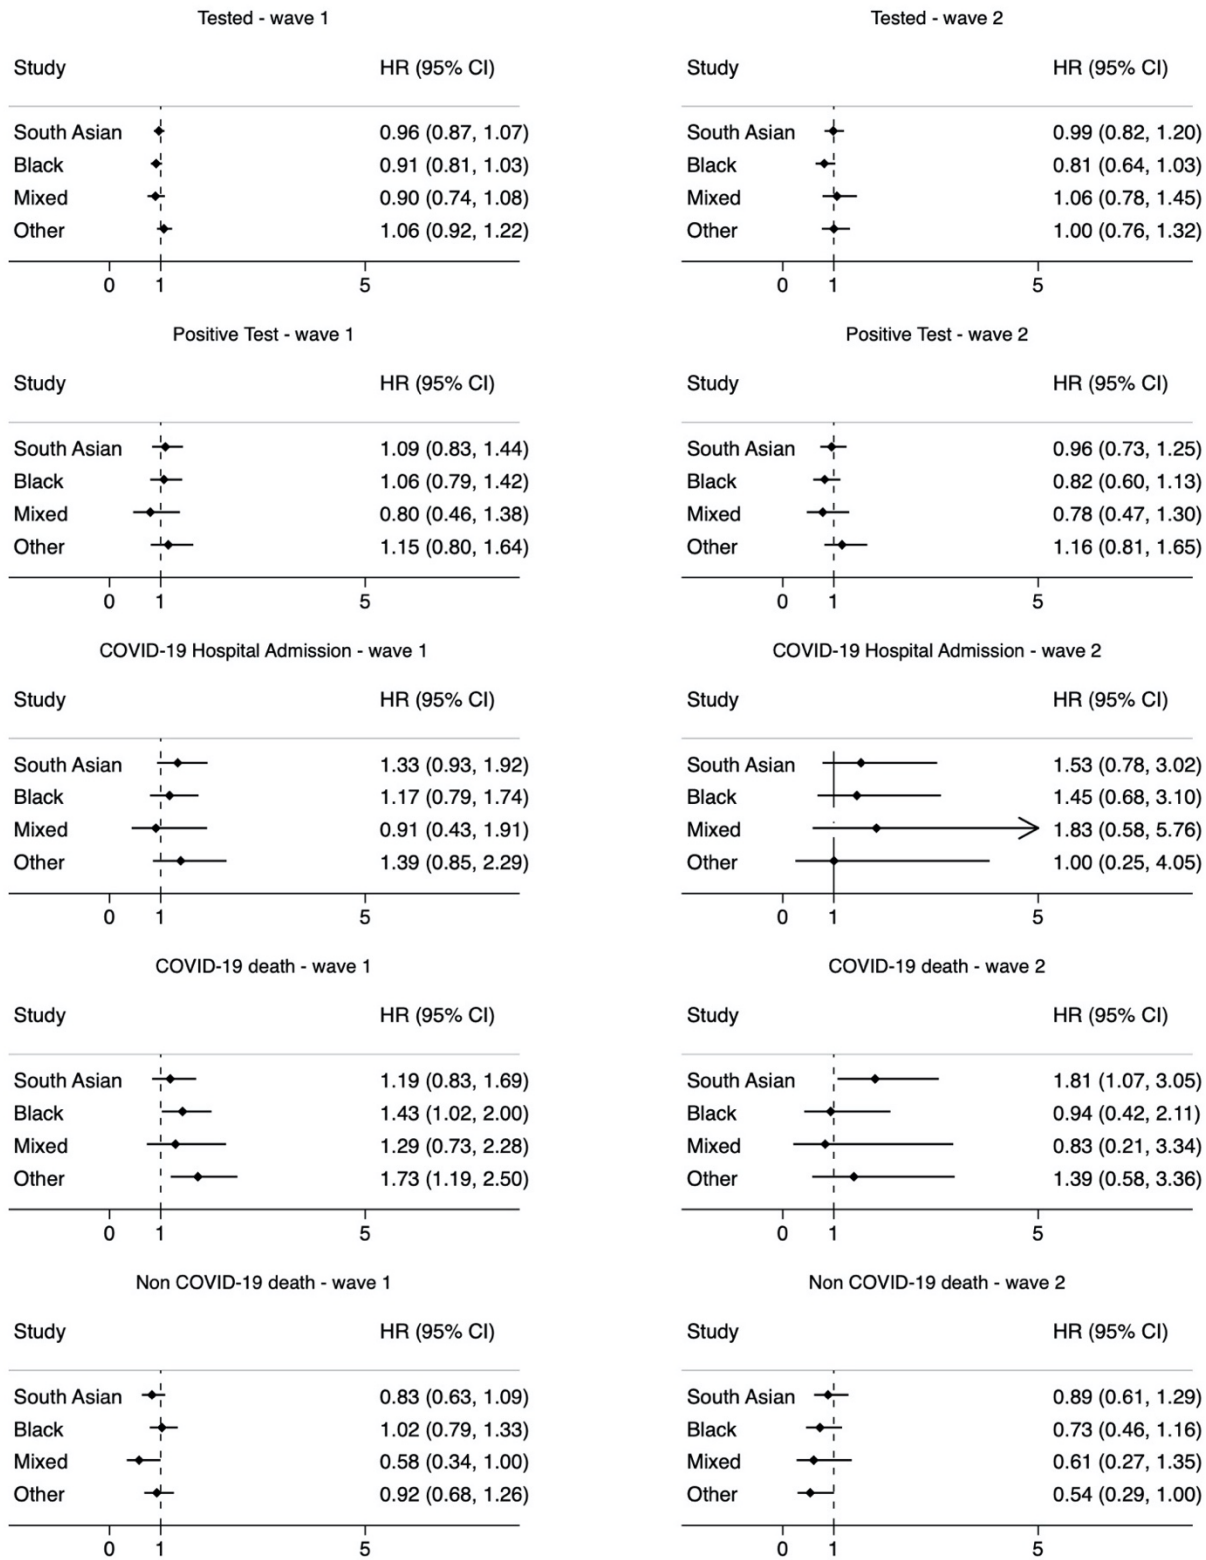

\*White is the reference category. Models adjust for age, sex, deprivation quintile, all pre-specified clinical co-morbidities, categories of BMI, HbA1c, and systolic and diastolic blood pressure, number of primary care consultations in the 12 months prior, and stratification by STP region.

Figure S3. Ethnic differences in all study outcomes in wave 1: Complete case analysis (CC) vs. multiple imputation (MI) in wave 1

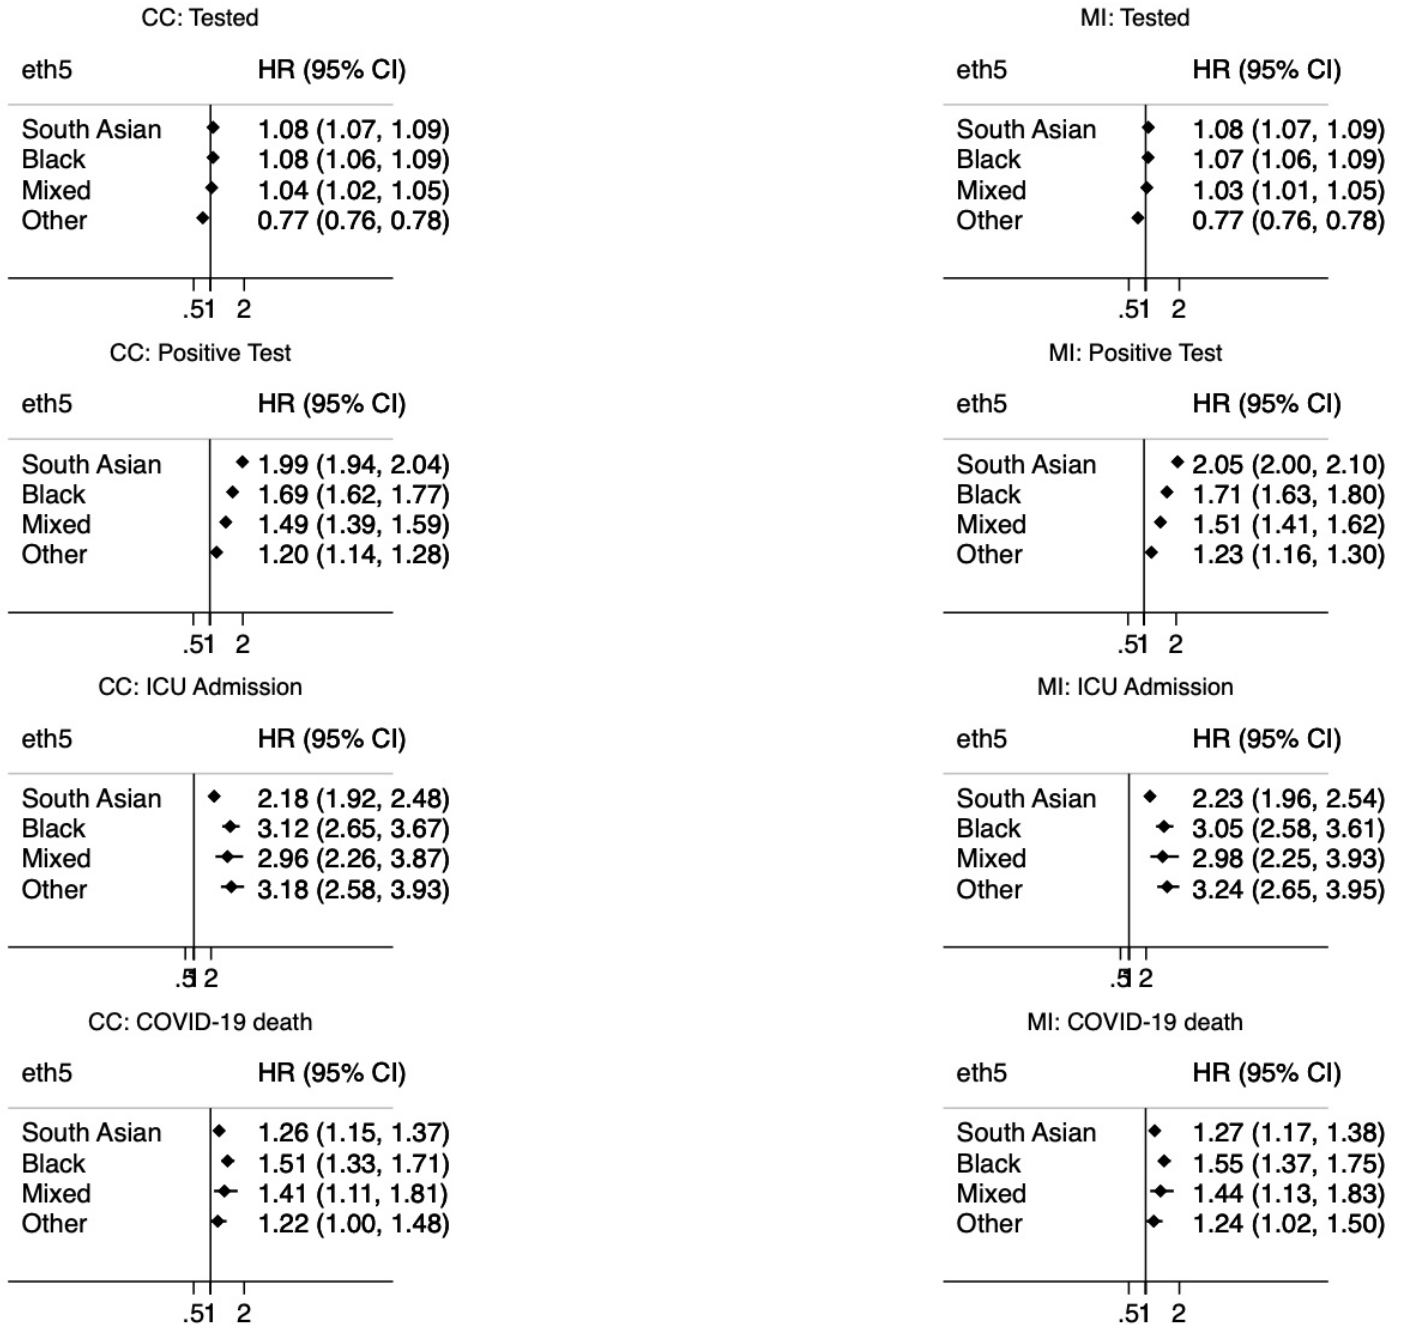

\*All White is the reference category. Models adjust for age, sex, deprivation quintile, all pre-specified clinical co-morbidities, categories of BMI, HbA1c, and systolic and diastolic blood pressure, number of primary care consultations in the 12 months prior, household size, and stratification by STP region.

\*Multiple imputation of missing ethnicity was performed in Stata using the mi suite of commands. Ethnicity data were considered to be missing at random. Multinomial logistic regression was used as the imputation model, including all other explanatory variables and the binary outcome indicator from the substantive regression in the model. 10 imputed datasets were created. Hazard ratios were combined using Rubin's rules.

Figure S4. Comparison between COVID-19 as any cause of death vs. underlying cause of death in wave 1

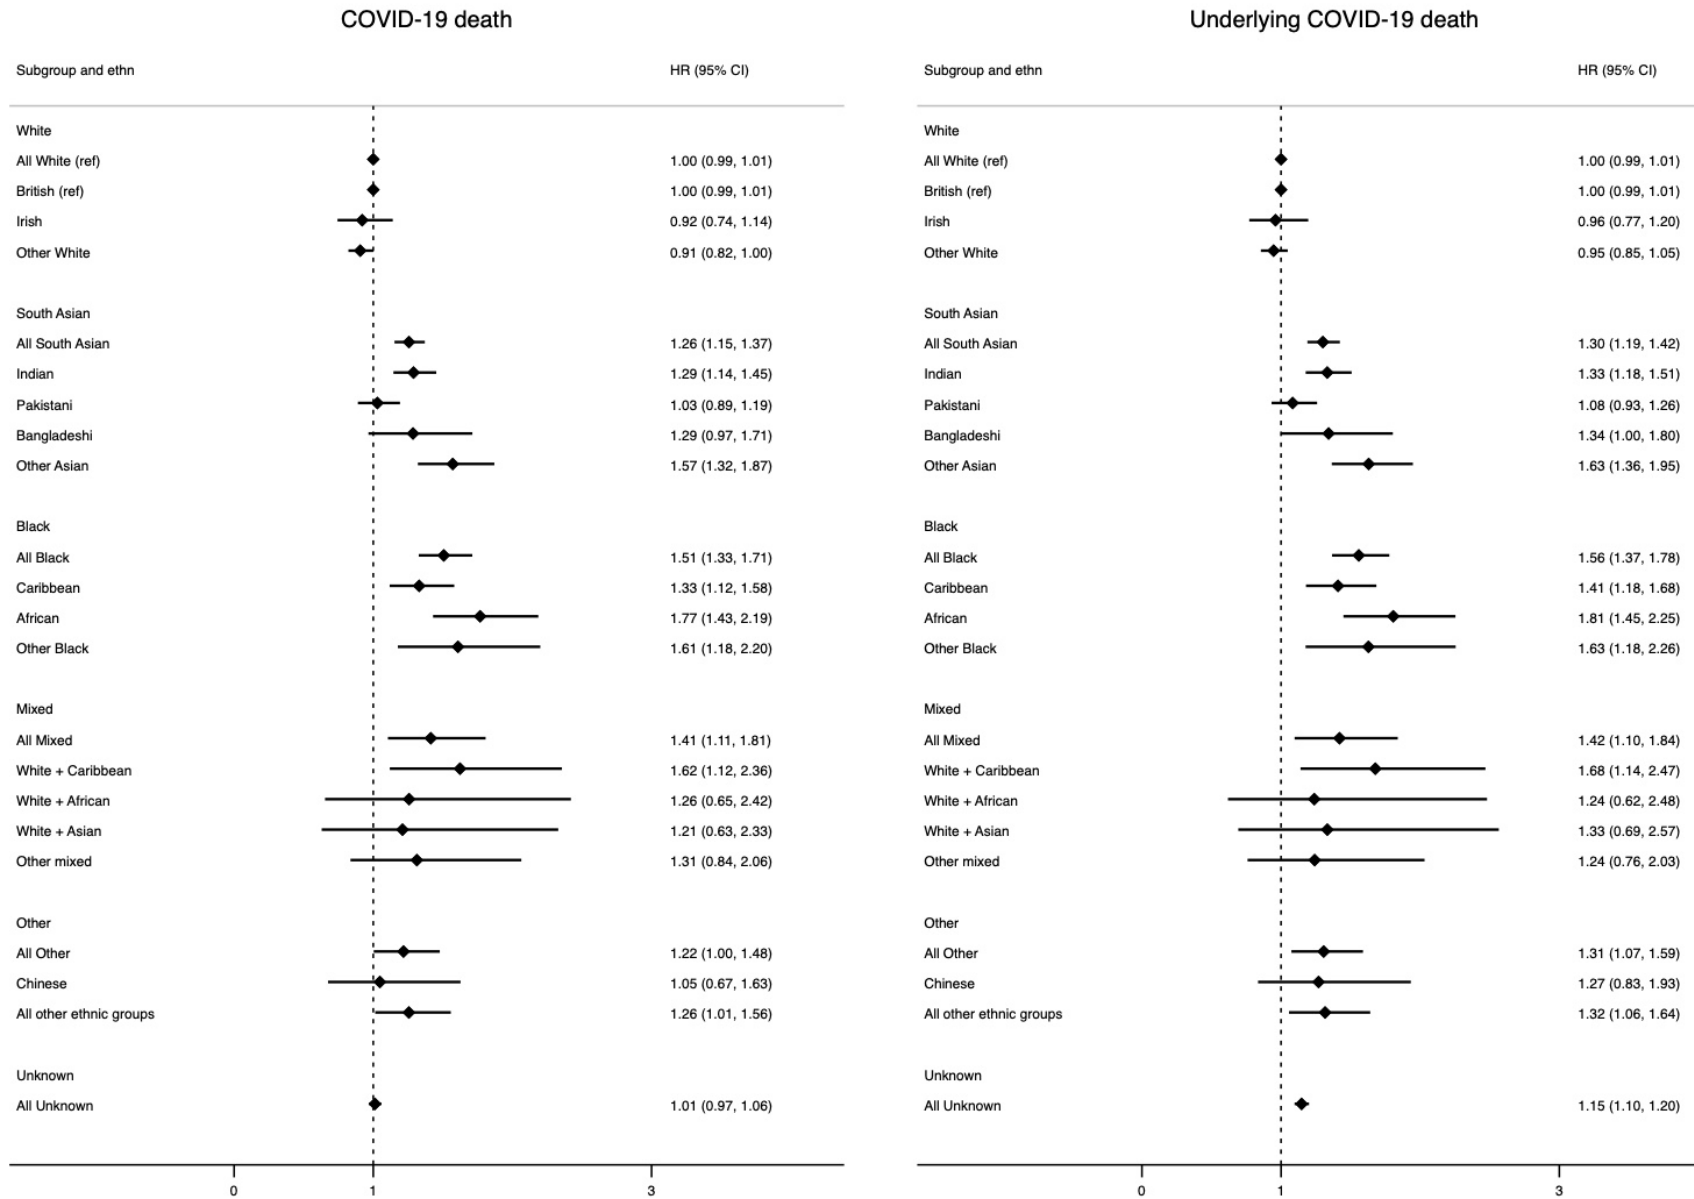

\*All White is the reference category for comparison of ethnicity in 5 categories. British is the reference category for comparison of ethnicity in 16 categories. Models adjust for age, sex, deprivation quintile, all pre-specified clinical co-morbidities, categories of BMI, HbA1c, and systolic and diastolic blood pressure, number of primary care consultations in the 12 months prior, and stratification by STP region.

Figure S5. Ethnic differences in COVID-19 outcomes with and without clustering by STP region in wave 1

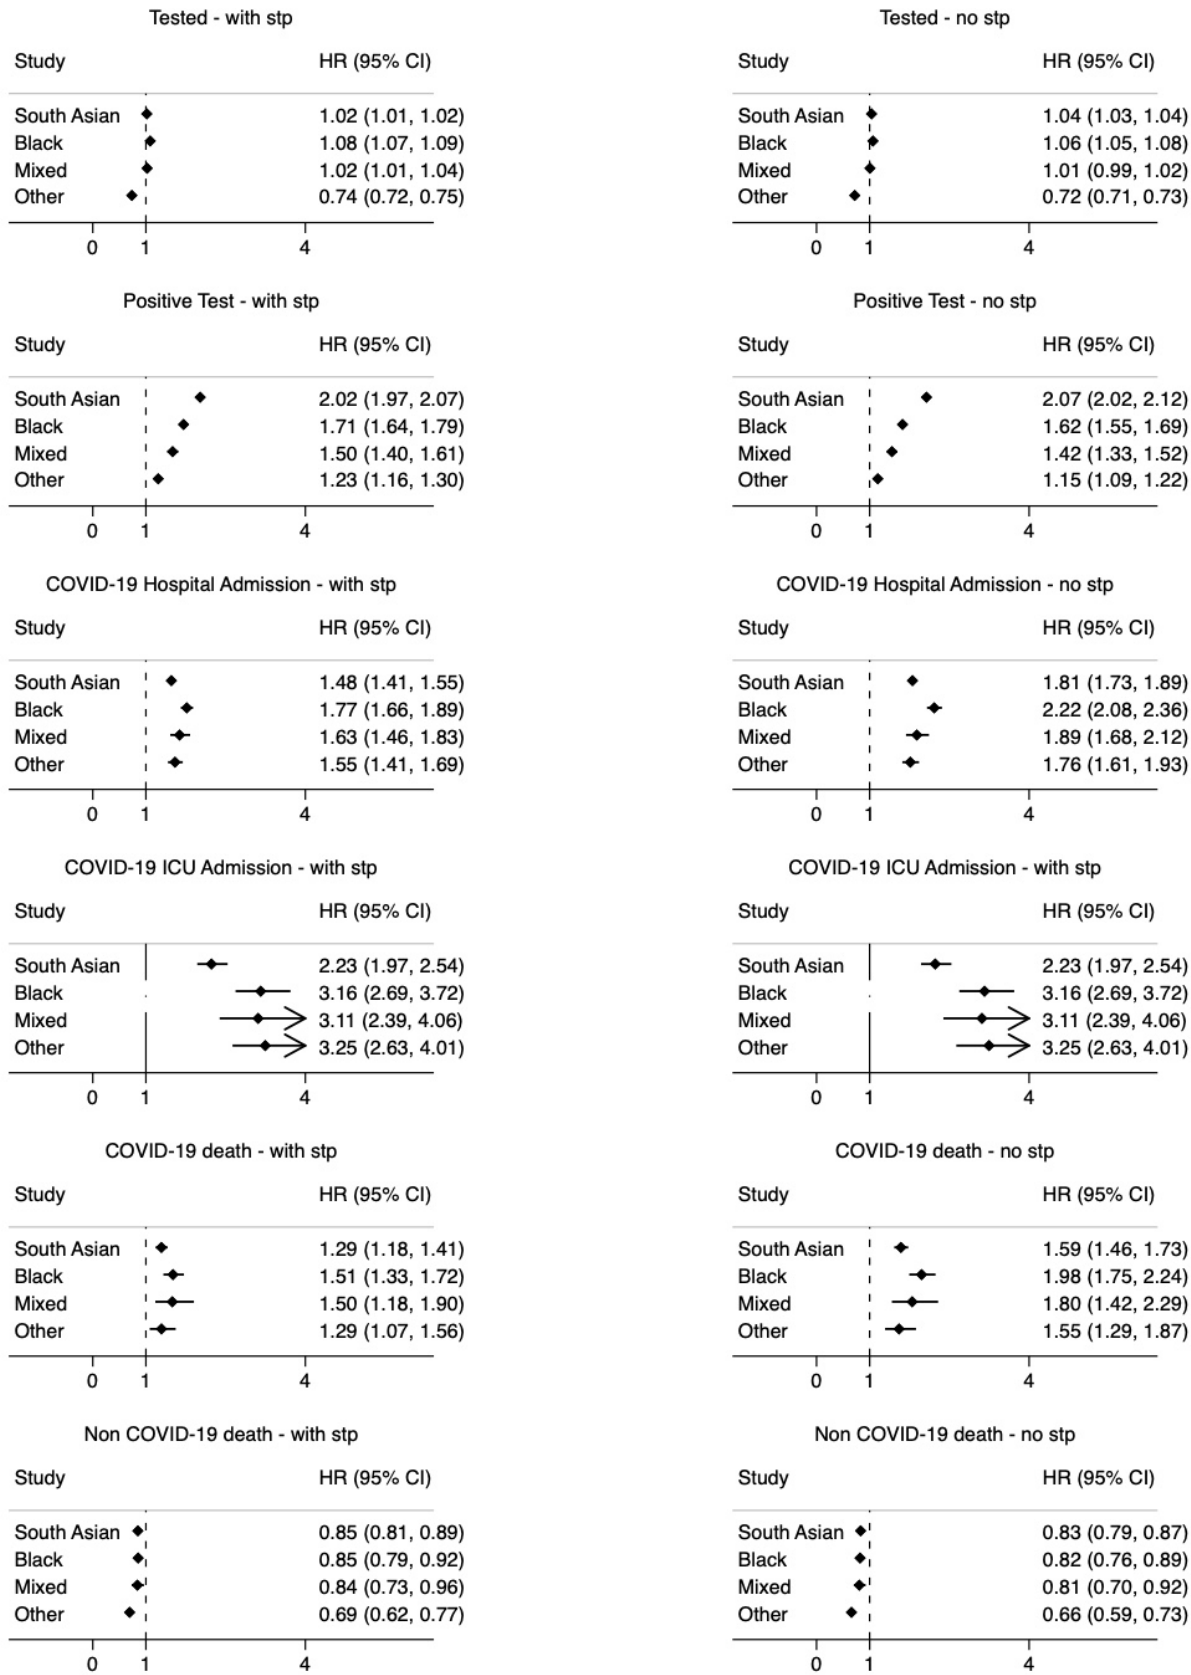

\*White is the reference category. \*models adjust for age, sex, deprivation quintile, all pre-specified clinical co-morbidities, categories of BMI, HbA1c, and systolic and diastolic blood pressure, number of primary care consultations in the 12 months prior.

Figure S6. Kaplan Meier Plots for survival by ethnic group and outcome in wave 1

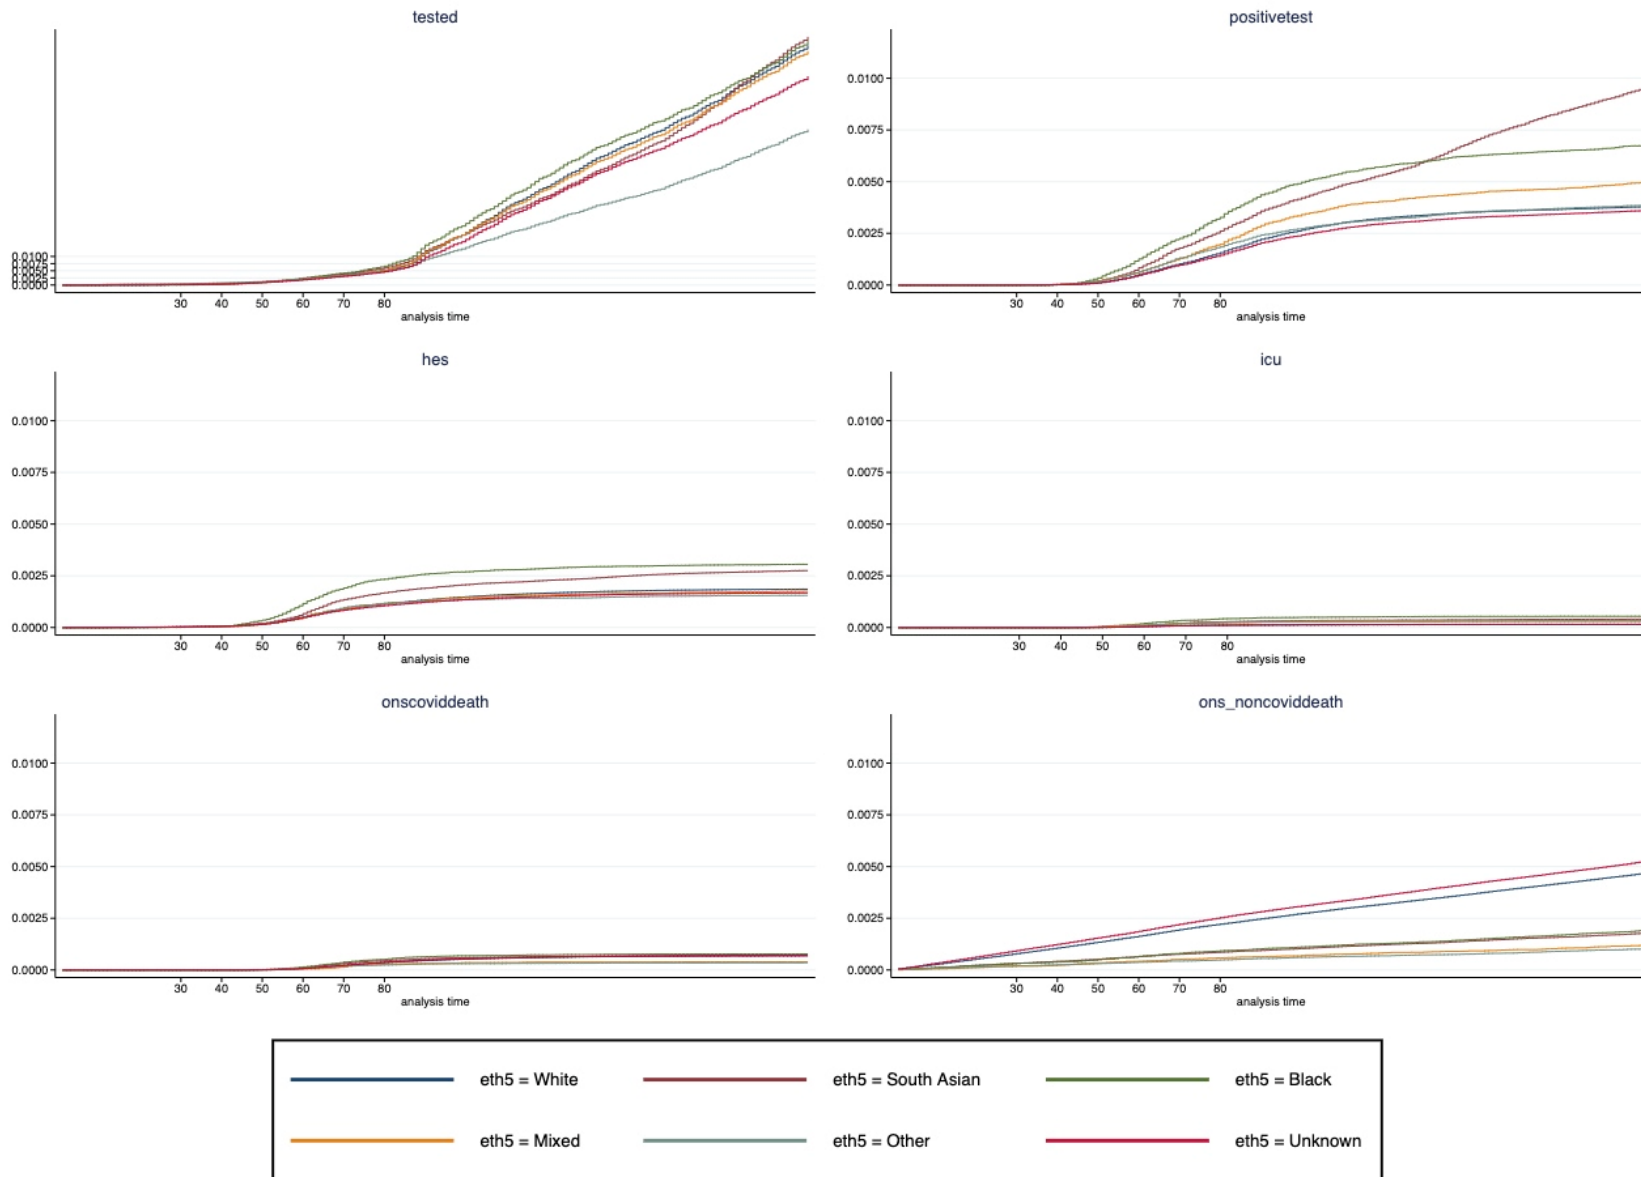

## Data access and verification

Access to the underlying identifiable and potentially re-identifiable pseudonymised electronic health record data is tightly governed by various legislative and regulatory frameworks, and restricted by best practice. The data in OpenSAFELY is drawn from General Practice data across England where TPP is the Data Processor. TPP developers (CB, RC, JP, FH, and SH) initiate an automated process to create pseudonymised records in the core OpenSAFELY database, which are copies of key structured data tables in the identifiable records. These are linked onto key external data resources that have also been pseudonymised via SHA-512 one-way hashing of NHS numbers using a shared salt. DataLab developers and PIs (BG, LS, CEM, SB, AJW, WH, DE, PI, and CTR) holding contracts with NHS England have access to the OpenSAFELY pseudonymised data tables as needed to develop the OpenSAFELY tools. These tools in turn enable researchers with OpenSAFELY Data Access Agreements to write and execute code for data management and data analysis without direct access to the underlying raw pseudonymised patient data, and to review the outputs of this code. All code for the full data management pipeline—from raw data to completed results for this analysis—and for the OpenSAFELY platform as a whole is available for review at [github.com/OpenSAFELY](https://github.com/OpenSAFELY). The data management and analysis code for this paper was led by RM, CTR, and CEM and contributed to by WJH, AS, BM, RME, KB, AYSW, EJW, HF, KW, HIM, CB, SB, AJW, AM, HJC, NJD, IDJ, LT, SJWE, and LS.
